## **COVID-19 transmission in the U.S. before vs. after relaxation of social distancing measures**

Alexander C. Tsai, MD\*<sup>1</sup>, Guy Harling, ScD<sup>2</sup>, Zahra Reynolds, MPH<sup>1</sup>, Rebecca F. Gilbert, BA<sup>1</sup>, Mark J. Siedner, MD<sup>1</sup>

### **Affiliations:**

<sup>1</sup> Massachusetts General Hospital, Boston, Massachusetts, United States

<sup>2</sup> University College London, London, United Kingdom

\* **Correspondence to:** Alexander C. Tsai, MD, MGH Center for Global Health, 125 Nashua Street, Ste. 722, Boston, Massachusetts 02114. E-mail: actsai@partners.org

Word count: 592 words

## **Abstract**

Background: All fifty U.S. states and the District of Columbia implemented social distancing measures that interrupted transmission of severe acute respiratory syndrome coronavirus 2 (SARS-CoV-2) and reduced morbidity and mortality from coronavirus disease 2019 (COVID-19). All 51 jurisdictions have since begun to relax these measures, albeit in an uncoordinated fashion.

Methods: We obtained state-level data on implementation and relaxation of social distancing measures. We fitted mixed-effects linear regression models with a random effect for state, specifying the time-varying, state-specific effective reproduction number ( $R_t$ , the expected number of secondary infections generated by each index case given date-specific population susceptibility and risk behavior). Explanatory variables included time in days, implementation period (1-21 days prior to first relaxation of any statewide social distancing measure vs. time from relaxation through May 28, 2020), and a time-by-period product term.

Results: During the three weeks prior to relaxation, the estimated  $R_t$  was declining by an average of 0.0016 units per day (95% confidence interval [CI], -0.0025 to -0.0008). At the time of initial relaxation, states had reported a median 7,628 cases (range, 337-361,313) and 289 COVID-attributable deaths (range, 7-28,663), and the median estimated  $R_t$  was 1.0 (range, 0.8-1.3) (i.e., the median rate of epidemic growth across states was estimated to be zero). After the first relaxation of statewide social distancing measures, the estimated  $R_t$  began increasing by an average of 0.0047 units per day (95% CI, 0.0037 to 0.0058) compared with the pre-relaxation

period. If these trends continue, the estimated state-level  $R_t$  would reach an average value of 1.05 (95% CI, 1.03-1.07) by 30 days after relaxation and 1.15 (95% CI, 1.11-1.18) by 60 days. A similar upward trajectory in the estimated  $R_t$  was observed after relaxation of statewide restrictions on internal movement.

Conclusions: Relaxation of U.S. statewide social distancing measures was associated with a subsequent reversal of an earlier downward trend in transmission of SARS-CoV-2, particularly in states with less active epidemics at the time of relaxation.

## Introduction

All fifty U.S. states and the District of Columbia implemented social distancing measures that interrupted transmission of severe acute respiratory syndrome coronavirus 2 (SARS-CoV-2) and reduced morbidity and mortality from coronavirus disease 2019 (COVID-19) (1, 2). All 51 jurisdictions have since begun to relax these measures, albeit in an uncoordinated fashion. Using state-level data, we undertook a longitudinal pretest-posttest comparison group study to determine the extent to which relaxation of social distancing measures in the U.S. has led to a recrudescence in transmission.

## Methods

We obtained state-level data on implementation and relaxation of social distancing measures, as described previously (2) (**Supplementary Appendix**). We fitted mixed-effects linear regression models with a random effect for state, specifying the time-varying, state-specific effective reproduction number ( $R_t$ , the expected number of secondary infections generated by each index case given date-specific population susceptibility and risk behavior, provided by Abbott et al. (3)) as the dependent variable. Explanatory variables included time in days, implementation period (1-21 days prior to first relaxation of any statewide social distancing measure vs. time from relaxation through May 28, 2020), and a time-by-period product term. In sensitivity analyses, we used an alternate model of  $R_t$  estimation (4), and fitted stratified models by number of deaths and  $R_t$  at the time of relaxation. As a secondary exposure, we examined relaxations of statewide restrictions on internal movement (“lockdowns”).

## Results

Between April 20 and June 1, 2020, all 51 jurisdictions had relaxed at least one statewide social distancing measure. The **Figure** displays a scatterplot of the estimated  $R_t$  for each state by day, along with a smoothed line derived from locally weighted scatterplot smoothing. During the three weeks prior to relaxation, the estimated  $R_t$  was declining by an average of 0.0016 units per day (95% confidence interval [CI], -0.0025 to -0.0008) (see **Table**). At the time of initial relaxation, states had reported a median 7,628 cases (range, 337-361,313) and 289 COVID-attributable deaths (range, 7-28,663), and the median estimated  $R_t$  was 1.0 (range, 0.8-1.3) (i.e., the median rate of epidemic growth across states was estimated to be zero). After the first relaxation of statewide social distancing measures, the estimated  $R_t$  began increasing by an average of 0.0047 units per day (95% CI, 0.0037 to 0.0058) compared with the pre-relaxation period. If these trends continue, the estimated state-level  $R_t$  would reach an average value of 1.05 (95% CI, 1.03-1.07) by 30 days after relaxation and 1.15 (95% CI, 1.11-1.18) by 60 days. A similar upward trajectory in the estimated  $R_t$  was observed after relaxation of statewide restrictions on internal movement. The estimated  $R_t$  increased faster after relaxation in states with a lower estimated  $R_t$  at the time of relaxation. Similar trajectories were obtained with alternative estimates of  $R_t$  (4).

## Discussion

Relaxation of U.S. statewide social distancing measures was associated with a subsequent reversal of an earlier downward trend in transmission of SARS-CoV-2, particularly in states with less active epidemics at the time of relaxation. The primary limitation of our analysis is that simultaneous events that influence epidemic growth or reporting, or public health policy, could also influence the trajectories of  $R_t$ . Nonetheless, these data suggest that suppression has failed. Active surveillance programs will be needed so that, should observed trends continue, state and local public health leaders can continuously evaluate the stringency of social distancing measures required to prevent subsequent epidemic surges (5). Considering projected timelines for vaccine development, low levels of population infection, and lack of data on protective immunity, thoughtful public health leadership will be needed to ensure that subsequent peaks of mortality are prevented.

## References

1. Hsiang S, Allen D, Annan-Phan S, Bell K, Bolliger I, Chong T, et al. The effect of large-scale anti-contagion policies on the COVID-19 pandemic. *Nature* 2020: Epub 8 Jun 2020. doi:2010.1038/s41586-41020-42404-41588.
2. Siedner MJ, Harling G, Reynolds Z, Gilbert RF, Haneuse S, Venkataramani AS, Tsai AC. Social distancing to slow the U.S. COVID-19 epidemic: longitudinal pretest-posttest comparison group study. *PLoS Med*, in press. Previous version circulated as: Siedner MJ, Harling G, Reynolds Z, Gilbert RF, Venkataramani A, Tsai AC. Social distancing to slow the U.S. COVID-19 epidemic: an interrupted time-series analysis. *medRxiv* Epub 8 Apr 2020. doi:2010.1101/2020.2004.2003.20052373.
3. Abbott S, Hellewell J, Thompson RN, Sherratt K, Gibbs HP, Bosse NI, et al. Estimating the time-varying reproduction number of SARS-CoV-2 using national and subnational case counts [version 1; peer review: awaiting peer review]. *Wellcome Open Res* 2020;5:112. Epub 111 Jun 2020. doi:2010.12688/wellcomeopenres.16006.12681.
4. Unwin HJT, Mishra SK, Bradley VC, Gandy A, Vollmer M, Mellan T, et al. Report 23: State-level tracking of COVID-19 in the United States. London: Imperial College London; 2020.
5. Kissler SM, Tedijanto C, Goldstein E, Grad YH, Lipsitch M. Projecting the transmission dynamics of SARS-CoV-2 through the postpandemic period. *Science* 2020;368(6493):860-868.

**Figure.** Scatterplot of the estimated  $R_t$  for each state by day, along with a smoothed line derived from locally weighted scatterplot smoothing. Panel (A) displays the estimated  $R_t$  in relation to the first relaxation of statewide social distancing measures. Panel (B) displays the estimated  $R_t$  in relation to relaxation of statewide restrictions on internal movement.

**A**

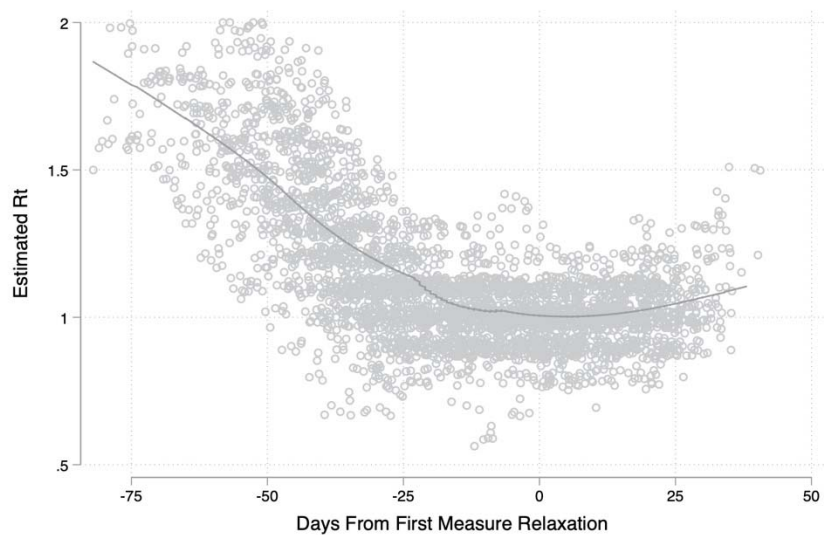

**B**

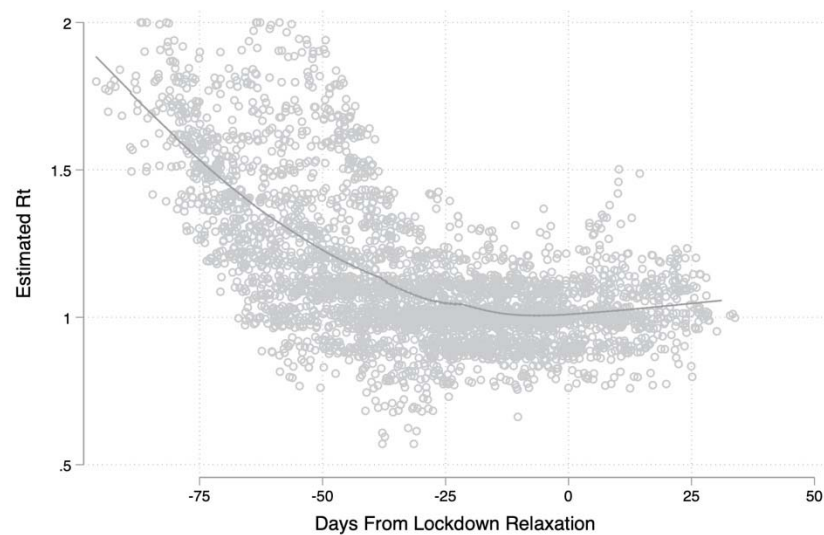



**Table.** Mixed effects linear regression models for the estimated  $R_t$  before vs. after relaxation of the first statewide social distancing measures and statewide restrictions on internal movement

|                                                                  | <b>Coefficient</b> | <b>95% Confidence Interval</b> | <b>P-value</b> |
|------------------------------------------------------------------|--------------------|--------------------------------|----------------|
| <b>Relaxation of first statewide social distancing measures</b>  |                    |                                |                |
| Constant                                                         | 0.989              | 0.969, 1.009                   | <0.001         |
| Time (days relative to relaxation)                               | -0.0016            | -0.0025, -0.0008               | <0.001         |
| Post-relaxation period                                           | -0.028             | -0.043, -0.014                 | <0.001         |
| Time $\times$ post-relaxation period                             | 0.0047             | 0.0037, 0.0058                 | <0.001         |
| <b>Relaxation of statewide restrictions on internal movement</b> |                    |                                |                |
| Constant                                                         | 0.983              | 0.959, 1.006                   | <0.001         |
| Time (days relative to relaxation)                               | -0.0012            | -0.0023, -0.0002               | 0.019          |
| Post-relaxation period                                           | 0.012              | -0.007, 0.031                  | 0.20           |
| Time $\times$ post-relaxation period                             | 0.003              | 0.002, 0.005                   | <0.001         |
| <b>Sensitivity analyses *</b>                                    |                    |                                |                |
| Alternative estimate of $R_t$ (4)                                | 0.007              | 0.005, 0.008                   | <0.001         |
| Stratified by transmission potential at the time of relaxation † |                    |                                |                |
| States with $R_t < 1$ at relaxation                              | 0.016              | 0.014, 0.018                   | <0.001         |
| States with $R_t \geq 1$ at relaxation                           | -0.0006            | -0.0018, 0.0006                | 0.31           |
| Stratified by epidemic size at the time of relaxation ‡          |                    |                                |                |
| States with <500 deaths at relaxation                            | 0.004              | 0.003, 0.006                   | <0.001         |
| States with $\geq 500$ deaths at relaxation                      | 0.006              | 0.004, 0.007                   | <0.001         |

\* Estimates presented below for the time  $\times$  post-relaxation period term only

†  $P < 0.001$  for strata product term

‡  $P = 0.35$  for strata product term

## Supplementary Appendix

Tsai AC, Harling G, Reynolds Z, Gilbert RF, Siedner MJ. COVID-19 transmission in the U.S. before vs. after relaxation of social distancing measures.

**Appendix Methods.** Search strategy to identify statewide social distancing measures being relaxed

**Appendix Table.** Dates of relaxation of statewide social distancing measures, by type of measure and by state

## Appendix Methods

Our strategy to identify all statewide social distancing measures being relaxed involved the triangulation of data from state government and third-party sources, as described previously in Siedner MJ, Harling G, Reynolds Z, Gilbert RF, Venkataramani A, Tsai AC. Social distancing to slow the U.S. COVID-19 epidemic: an interrupted time-series analysis. *medRxiv* Epub 8 Apr 2020. doi:10.1101/2020.2004.2003.20052373. First, during March 25-June 5, 2020 we searched the web sites for all 50 U.S. state and commonwealth governments and the District of Columbia to identify all statewide social distancing measures that were implemented to address the spread of coronavirus infection (including executive orders, legislation, state of emergency or public health emergency declarations, major disaster declarations, restrictions on travel or internal movement, limitations on mass gatherings, and closures of schools or workplaces) that were subsequently relaxed or rescinded. Our searches included the web sites for the respective state governments, state departments of education, state departments of public health, and any state-sponsored COVID-specific web sites.

To ensure the completeness of our search, we then cross-referenced our findings against several third-party sources:

- Cohn A. These states have partially reopened after coronavirus shutdown. *The Hill*, April 28, 2020. Available at: <https://thehill.com/homenews/state-watch/495012-these-states-have-reopened-after-coronavirus-shutdown>. Last accessed June 5, 2020.
- Elassar A. This is where each state is during its phased reopening. *CNN*, May 27, 2020. Available at: <https://www.cnn.com/interactive/2020/us/states-reopen-coronavirus-trnd/>. Last accessed June 5, 2020.
- Martineau P. Which states are reopening, which remain on lockdown, and why. *Wired*, May 6, 2020. Available at: <https://www.wired.com/story/which-states-reopening-lockdown/>. Last accessed June 5, 2020.
- Mervosh S, Lee JC, Gamio L, Popvich N. See how all 50 states are reopening. *New York Times*. Available at: <https://www.nytimes.com/interactive/2020/us/states-reopen-map-coronavirus.html>. Last accessed June 5, 2020.
- Treisman R. Which states are reopening? A state-by-state guide. *NPR*, June 4, 2020. Available at: <https://www.npr.org/2020/03/12/815200313/what-governors-are-doing-to-tackle-spreading-coronavirus>. Last accessed June 5, 2020.

In the event we identified any discrepancies, official state government sources were assumed to have precedence.

Relaxation of social distancing policies were categorized as follows: reopening public schools, including child care facilities and camps; reopening workplaces, including professional offices and curbside retail; reopening the service industry, including barber shops, bowling alleys, cafes, gyms, in-store retail, libraries, pet groomers, museums, restaurants, salons, and zoos; allowing public events, including concerts, conferences, religious assembly, sporting events, and theatres; reopening outdoor recreational facilities, including beaches, campgrounds, golf courses, parks, swimming pools, and team athletics; lifting restrictions on internal movement (i.e., shelter-in-place orders, stay-at-home orders, “lockdowns”); and lifting mandatory quarantines for interstate travel.

**Appendix Table.** Dates of relaxation of statewide social distancing measures, by type of measure and by state

| State    | Date      | A | B | C | D | E | F | G | URL                                                                                                                                                                                                                                                                                                                                                                                                                                                                                                                                                                                                                                                                                                                                      |
|----------|-----------|---|---|---|---|---|---|---|------------------------------------------------------------------------------------------------------------------------------------------------------------------------------------------------------------------------------------------------------------------------------------------------------------------------------------------------------------------------------------------------------------------------------------------------------------------------------------------------------------------------------------------------------------------------------------------------------------------------------------------------------------------------------------------------------------------------------------------|
| Alabama  | 4/30/2020 | ✓ | ✓ |   |   | ✓ | ✓ |   | • <a href="https://governor.alabama.gov/assets/2020/04/Safer-At-Home-Order-Signed-4.28.20.pdf">https://governor.alabama.gov/assets/2020/04/Safer-At-Home-Order-Signed-4.28.20.pdf</a>                                                                                                                                                                                                                                                                                                                                                                                                                                                                                                                                                    |
| Alabama  | 5/11/2020 |   | ✓ | ✓ | ✓ | ✓ |   |   | • <a href="https://governor.alabama.gov/assets/2020/05/Safer-at-Home-Order-FINAL-5.8.2020.pdf">https://governor.alabama.gov/assets/2020/05/Safer-at-Home-Order-FINAL-5.8.2020.pdf</a>                                                                                                                                                                                                                                                                                                                                                                                                                                                                                                                                                    |
| Alabama  | 5/22/2020 |   | ✓ |   | ✓ | ✓ |   |   | • <a href="https://governor.alabama.gov/assets/2020/05/Safer-at-Home-Order-FINAL-5.21.2020.pdf">https://governor.alabama.gov/assets/2020/05/Safer-at-Home-Order-FINAL-5.21.2020.pdf</a>                                                                                                                                                                                                                                                                                                                                                                                                                                                                                                                                                  |
| Alabama  | 5/23/2020 | ✓ |   |   |   |   |   |   | • <a href="https://governor.alabama.gov/assets/2020/05/Safer-at-Home-Order-FINAL-5.21.2020.pdf">https://governor.alabama.gov/assets/2020/05/Safer-at-Home-Order-FINAL-5.21.2020.pdf</a>                                                                                                                                                                                                                                                                                                                                                                                                                                                                                                                                                  |
| Alabama  | 6/1/2020  | ✓ |   |   |   |   |   |   | • <a href="https://governor.alabama.gov/assets/2020/05/Safer-at-Home-Order-FINAL-5.21.2020.pdf">https://governor.alabama.gov/assets/2020/05/Safer-at-Home-Order-FINAL-5.21.2020.pdf</a>                                                                                                                                                                                                                                                                                                                                                                                                                                                                                                                                                  |
| Alaska   | 4/24/2020 | ✓ | ✓ | ✓ | ✓ |   |   | ✓ | • <a href="https://gov.alaska.gov/wp-content/uploads/sites/2/03272020-SOA-COVID-19-Health-Mandate-011.pdf">https://gov.alaska.gov/wp-content/uploads/sites/2/03272020-SOA-COVID-19-Health-Mandate-011.pdf</a><br>• <a href="https://covid19.alaska.gov/health-mandates/">https://covid19.alaska.gov/health-mandates/</a><br>• <a href="https://gov.alaska.gov/newsroom/2020/04/21/governor-unveil-path-to-reopening-alaskan-economy/">https://gov.alaska.gov/newsroom/2020/04/21/governor-unveil-path-to-reopening-alaskan-economy/</a><br>• <a href="https://gov.alaska.gov/newsroom/2020/04/22/governor-issues-covid-19-health-mandate-16/">https://gov.alaska.gov/newsroom/2020/04/22/governor-issues-covid-19-health-mandate-16/</a> |
| Alaska   | 5/8/2020  |   | ✓ | ✓ | ✓ | ✓ |   |   | • <a href="https://gov.alaska.gov/newsroom/2020/05/06/governor-dunleavy-announces-phase-two-of-reopen-alaska-responsibly-plan/">https://gov.alaska.gov/newsroom/2020/05/06/governor-dunleavy-announces-phase-two-of-reopen-alaska-responsibly-plan/</a>                                                                                                                                                                                                                                                                                                                                                                                                                                                                                  |
| Alaska   | 5/22/2020 |   | ✓ | ✓ | ✓ | ✓ |   |   | • <a href="https://gov.alaska.gov/newsroom/2020/05/19/governor-announces-phase-three-of-reopen-alaska-responsibly-plan/">https://gov.alaska.gov/newsroom/2020/05/19/governor-announces-phase-three-of-reopen-alaska-responsibly-plan/</a>                                                                                                                                                                                                                                                                                                                                                                                                                                                                                                |
| Alaska   | 5/29/2020 |   |   |   | ✓ |   |   |   | • <a href="https://covid19.alaska.gov/wp-content/uploads/2020/06/06012020-Large-Gatherings-and-Community-Events.pdf">https://covid19.alaska.gov/wp-content/uploads/2020/06/06012020-Large-Gatherings-and-Community-Events.pdf</a>                                                                                                                                                                                                                                                                                                                                                                                                                                                                                                        |
| Arizona  | 5/4/2020  |   | ✓ |   |   |   |   |   | • <a href="https://azgovernor.gov/sites/default/files/eo_2020-33_0.pdf">https://azgovernor.gov/sites/default/files/eo_2020-33_0.pdf</a>                                                                                                                                                                                                                                                                                                                                                                                                                                                                                                                                                                                                  |
| Arizona  | 5/8/2020  |   | ✓ | ✓ |   |   |   |   | • <a href="https://azgovernor.gov/sites/default/files/eo_2020-33_0.pdf">https://azgovernor.gov/sites/default/files/eo_2020-33_0.pdf</a>                                                                                                                                                                                                                                                                                                                                                                                                                                                                                                                                                                                                  |
| Arizona  | 5/11/2020 |   |   | ✓ |   |   |   |   | • <a href="https://azgovernor.gov/governor/news/2020/05/guidance-restaurants-barbers-and-cosmetologists">https://azgovernor.gov/governor/news/2020/05/guidance-restaurants-barbers-and-cosmetologists</a>                                                                                                                                                                                                                                                                                                                                                                                                                                                                                                                                |
| Arizona  | 5/13/2020 |   | ✓ | ✓ |   |   |   |   | • <a href="https://azgovernor.gov/governor/news/2020/05/governor-ducey-announces-next-phase-arizona-recovery">https://azgovernor.gov/governor/news/2020/05/governor-ducey-announces-next-phase-arizona-recovery</a>                                                                                                                                                                                                                                                                                                                                                                                                                                                                                                                      |
| Arizona  | 5/16/2020 |   | ✓ |   |   | ✓ | ✓ | ✓ | • <a href="https://azgovernor.gov/sites/default/files/executive_order_2020-36_return_stronger.pdf">https://azgovernor.gov/sites/default/files/executive_order_2020-36_return_stronger.pdf</a><br>• <a href="https://twitter.com/dougducey/status/1260340491414978560">https://twitter.com/dougducey/status/1260340491414978560</a>                                                                                                                                                                                                                                                                                                                                                                                                       |
| Arkansas | 5/4/2020  |   | ✓ | ✓ | ✓ |   |   |   | • <a href="https://www.healthy.arkansas.gov/images/uploads/pdf/directive_gym_fitness.pdf">https://www.healthy.arkansas.gov/images/uploads/pdf/directive_gym_fitness.pdf</a><br>• <a href="https://www.healthy.arkansas.gov/images/uploads/pdf/directive_large_outdoor_venues.pdf">https://www.healthy.arkansas.gov/images/uploads/pdf/directive_large_outdoor_venues.pdf</a>                                                                                                                                                                                                                                                                                                                                                             |
| Arkansas | 5/6/2020  |   | ✓ | ✓ |   |   |   |   | • <a href="https://www.healthy.arkansas.gov/images/uploads/pdf/directive_barbers.pdf">https://www.healthy.arkansas.gov/images/uploads/pdf/directive_barbers.pdf</a>                                                                                                                                                                                                                                                                                                                                                                                                                                                                                                                                                                      |
| Arkansas | 5/11/2020 |   |   | ✓ |   |   |   |   | • <a href="https://www.healthy.arkansas.gov/images/uploads/pdf/Resume_Restaurant_Dine_In_May_11_directive_FINAL.pdf">https://www.healthy.arkansas.gov/images/uploads/pdf/Resume_Restaurant_Dine_In_May_11_directive_FINAL.pdf</a>                                                                                                                                                                                                                                                                                                                                                                                                                                                                                                        |
| Arkansas | 5/15/2020 |   |   |   |   | ✓ |   |   | • <a href="https://governor.arkansas.gov/news-media/press-releases/state-parks-lifting-some-restrictions-for-arkansas-residents-governor-annou">https://governor.arkansas.gov/news-media/press-releases/state-parks-lifting-some-restrictions-for-arkansas-residents-governor-annou</a>                                                                                                                                                                                                                                                                                                                                                                                                                                                  |
| Arkansas | 5/18/2020 | ✓ | ✓ |   | ✓ |   |   |   | • <a href="https://www.healthy.arkansas.gov/images/uploads/pdf/directive_large_indoor_venues.pdf">https://www.healthy.arkansas.gov/images/uploads/pdf/directive_large_indoor_venues.pdf</a><br>• <a href="https://www.healthy.arkansas.gov/images/uploads/pdf/casino_directive.pdf">https://www.healthy.arkansas.gov/images/uploads/pdf/casino_directive.pdf</a><br>• <a href="https://www.healthy.arkansas.gov/images/uploads/pdf/directive_covid_summer_day_camps.pdf">https://www.healthy.arkansas.gov/images/uploads/pdf/directive_covid_summer_day_camps.pdf</a>                                                                                                                                                                    |
| Arkansas | 5/22/2020 |   |   |   |   | ✓ |   |   | • <a href="https://www.healthy.arkansas.gov/images/uploads/pdf/PoolRecreationalDirectiveFinal5.8.20.pdf">https://www.healthy.arkansas.gov/images/uploads/pdf/PoolRecreationalDirectiveFinal5.8.20.pdf</a>                                                                                                                                                                                                                                                                                                                                                                                                                                                                                                                                |

|                      |           |   |   |   |   |   |   |  |                                                                                                                                                                                                                                                                                                                                                                                                                                                                                                                                                                                                                    |
|----------------------|-----------|---|---|---|---|---|---|--|--------------------------------------------------------------------------------------------------------------------------------------------------------------------------------------------------------------------------------------------------------------------------------------------------------------------------------------------------------------------------------------------------------------------------------------------------------------------------------------------------------------------------------------------------------------------------------------------------------------------|
| Arkansas             | 5/26/2020 | ✓ | ✓ |   |   |   |   |  | <ul style="list-style-type: none"> <li>• <a href="https://www.healthy.arkansas.gov/images/uploads/pdf/directive_bars_and_clubs.pdf">https://www.healthy.arkansas.gov/images/uploads/pdf/directive_bars_and_clubs.pdf</a></li> </ul>                                                                                                                                                                                                                                                                                                                                                                                |
| Arkansas             | 5/31/2020 | ✓ |   |   |   |   |   |  | <ul style="list-style-type: none"> <li>• <a href="https://www.healthy.arkansas.gov/images/uploads/pdf/directive_overnight_camps.pdf">https://www.healthy.arkansas.gov/images/uploads/pdf/directive_overnight_camps.pdf</a></li> </ul>                                                                                                                                                                                                                                                                                                                                                                              |
| Arkansas             | 6/1/2020  |   |   |   | ✓ |   |   |  | <ul style="list-style-type: none"> <li>• <a href="https://www.healthy.arkansas.gov/images/uploads/pdf/directive_team_sports_.pdf">https://www.healthy.arkansas.gov/images/uploads/pdf/directive_team_sports_.pdf</a></li> </ul>                                                                                                                                                                                                                                                                                                                                                                                    |
| California           | 5/8/2020  | ✓ | ✓ |   |   |   |   |  | <ul style="list-style-type: none"> <li>• <a href="https://www.gov.ca.gov/wp-content/uploads/2020/05/5.4.20-EO-N-60-20-text.pdf">https://www.gov.ca.gov/wp-content/uploads/2020/05/5.4.20-EO-N-60-20-text.pdf</a></li> </ul>                                                                                                                                                                                                                                                                                                                                                                                        |
| California           | 5/25/2020 | ✓ | ✓ | ✓ |   |   |   |  | <ul style="list-style-type: none"> <li>• <a href="https://www.cdph.ca.gov/Programs/OPA/Pages/NR20-100.aspx">https://www.cdph.ca.gov/Programs/OPA/Pages/NR20-100.aspx</a></li> </ul>                                                                                                                                                                                                                                                                                                                                                                                                                                |
| California           | 5/26/2020 | ✓ | ✓ |   |   |   |   |  | <ul style="list-style-type: none"> <li>• <a href="https://www.cdph.ca.gov/Programs/OPA/Pages/NR20-101.aspx">https://www.cdph.ca.gov/Programs/OPA/Pages/NR20-101.aspx</a></li> </ul>                                                                                                                                                                                                                                                                                                                                                                                                                                |
| Colorado             | 4/27/2020 | ✓ |   |   |   | ✓ |   |  | <ul style="list-style-type: none"> <li>• <a href="https://covid19.colorado.gov/safer-at-home">https://covid19.colorado.gov/safer-at-home</a></li> </ul>                                                                                                                                                                                                                                                                                                                                                                                                                                                            |
| Colorado             | 5/1/2020  | ✓ | ✓ |   |   |   |   |  | <ul style="list-style-type: none"> <li>• <a href="https://covid19.colorado.gov/safer-at-home">https://covid19.colorado.gov/safer-at-home</a></li> </ul>                                                                                                                                                                                                                                                                                                                                                                                                                                                            |
| Colorado             | 5/4/2020  | ✓ |   |   |   |   |   |  | <ul style="list-style-type: none"> <li>• <a href="https://covid19.colorado.gov/safer-at-home">https://covid19.colorado.gov/safer-at-home</a></li> </ul>                                                                                                                                                                                                                                                                                                                                                                                                                                                            |
| Colorado             | 5/12/2020 |   |   |   | ✓ |   |   |  | <ul style="list-style-type: none"> <li>• <a href="https://www.colorado.gov/governor/news/governor-polis-signs-updated-safer-home-executive-order-transition-safer-home-and-vast-great">https://www.colorado.gov/governor/news/governor-polis-signs-updated-safer-home-executive-order-transition-safer-home-and-vast-great</a></li> </ul>                                                                                                                                                                                                                                                                          |
| Colorado             | 5/25/2020 |   |   |   | ✓ |   |   |  | <ul style="list-style-type: none"> <li>• <a href="https://www.colorado.gov/governor/news/governor-polis-issues-guidance-restaurants-summer-camps-and-private-camping">https://www.colorado.gov/governor/news/governor-polis-issues-guidance-restaurants-summer-camps-and-private-camping</a></li> </ul>                                                                                                                                                                                                                                                                                                            |
| Colorado             | 5/27/2020 |   | ✓ |   |   |   |   |  | <ul style="list-style-type: none"> <li>• <a href="https://www.colorado.gov/governor/news/governor-polis-issues-guidance-restaurants-summer-camps-and-private-camping">https://www.colorado.gov/governor/news/governor-polis-issues-guidance-restaurants-summer-camps-and-private-camping</a></li> </ul>                                                                                                                                                                                                                                                                                                            |
| Colorado             | 6/1/2020  | ✓ |   |   |   |   |   |  | <ul style="list-style-type: none"> <li>• <a href="https://www.colorado.gov/governor/news/governor-polis-issues-guidance-restaurants-summer-camps-and-private-camping">https://www.colorado.gov/governor/news/governor-polis-issues-guidance-restaurants-summer-camps-and-private-camping</a></li> </ul>                                                                                                                                                                                                                                                                                                            |
| Connecticut          | 5/20/2020 | ✓ | ✓ |   |   | ✓ |   |  | <ul style="list-style-type: none"> <li>• <a href="https://portal.ct.gov/-/media/Office-of-the-Governor/Executive-Orders/Lamont-Executive-Orders/Executive-Order-No-7PP.pdf?la=en">https://portal.ct.gov/-/media/Office-of-the-Governor/Executive-Orders/Lamont-Executive-Orders/Executive-Order-No-7PP.pdf?la=en</a></li> </ul>                                                                                                                                                                                                                                                                                    |
| Connecticut          | 6/1/2020  | ✓ | ✓ | ✓ |   |   |   |  | <ul style="list-style-type: none"> <li>• <a href="https://portal.ct.gov/-/media/Office-of-the-Governor/Executive-Orders/Lamont-Executive-Orders/Executive-Order-No-7TT.pdf?la=en">https://portal.ct.gov/-/media/Office-of-the-Governor/Executive-Orders/Lamont-Executive-Orders/Executive-Order-No-7TT.pdf?la=en</a></li> </ul>                                                                                                                                                                                                                                                                                    |
| Delaware             | 5/15/2020 | ✓ | ✓ |   |   |   |   |  | <ul style="list-style-type: none"> <li>• <a href="https://governor.delaware.gov/wp-content/uploads/sites/24/2020/05/Delaware-Economic-Reopening-Phase-1-Revised-5.28.20.pdf">https://governor.delaware.gov/wp-content/uploads/sites/24/2020/05/Delaware-Economic-Reopening-Phase-1-Revised-5.28.20.pdf</a></li> </ul>                                                                                                                                                                                                                                                                                              |
| Delaware             | 5/18/2020 |   |   |   | ✓ |   |   |  | <ul style="list-style-type: none"> <li>• <a href="https://coronavirus.delaware.gov/wp-content/uploads/sites/177/2020/06/Houses-of-Worship-Guidance-Revised-6-2-20.pdf">https://coronavirus.delaware.gov/wp-content/uploads/sites/177/2020/06/Houses-of-Worship-Guidance-Revised-6-2-20.pdf</a></li> </ul>                                                                                                                                                                                                                                                                                                          |
| Delaware             | 5/20/2020 | ✓ | ✓ |   |   |   |   |  | <ul style="list-style-type: none"> <li>• <a href="https://news.delaware.gov/2020/05/19/governor-carney-announces-additional-interim-steps-for-retail-restaurant-businesses-to-expand-operations/">https://news.delaware.gov/2020/05/19/governor-carney-announces-additional-interim-steps-for-retail-restaurant-businesses-to-expand-operations/</a></li> </ul>                                                                                                                                                                                                                                                    |
| Delaware             | 5/22/2020 |   |   |   | ✓ |   |   |  | <ul style="list-style-type: none"> <li>• <a href="https://governor.delaware.gov/wp-content/uploads/sites/24/2020/05/Delaware-Economic-Reopening-Phase-1-Revised-5.28.20.pdf">https://governor.delaware.gov/wp-content/uploads/sites/24/2020/05/Delaware-Economic-Reopening-Phase-1-Revised-5.28.20.pdf</a></li> </ul>                                                                                                                                                                                                                                                                                              |
| Delaware             | 6/1/2020  | ✓ | ✓ | ✓ | ✓ | ✓ | ✓ |  | <ul style="list-style-type: none"> <li>• <a href="https://news.delaware.gov/2020/05/26/governor-carney-announces-lifting-of-short-term-rental-ban-out-of-state-quarantine-on-june-1">https://news.delaware.gov/2020/05/26/governor-carney-announces-lifting-of-short-term-rental-ban-out-of-state-quarantine-on-june-1</a></li> <li>• <a href="https://governor.delaware.gov/wp-content/uploads/sites/24/2020/05/Delaware-Economic-Reopening-Phase-1-Revised-5.28.20.pdf">https://governor.delaware.gov/wp-content/uploads/sites/24/2020/05/Delaware-Economic-Reopening-Phase-1-Revised-5.28.20.pdf</a></li> </ul> |
| District of Columbia | 5/29/2020 | ✓ | ✓ |   | ✓ | ✓ |   |  | <ul style="list-style-type: none"> <li>• <a href="https://coronavirus.dc.gov/phaseone">https://coronavirus.dc.gov/phaseone</a></li> </ul>                                                                                                                                                                                                                                                                                                                                                                                                                                                                          |
| Florida              | 5/4/2020  | ✓ | ✓ |   |   | ✓ |   |  | <ul style="list-style-type: none"> <li>• <a href="https://www.flgov.com/wp-content/uploads/orders/2020/EO_20-112.pdf">https://www.flgov.com/wp-content/uploads/orders/2020/EO_20-112.pdf</a></li> </ul>                                                                                                                                                                                                                                                                                                                                                                                                            |
| Florida              | 5/11/2020 | ✓ | ✓ |   |   |   |   |  | <ul style="list-style-type: none"> <li>• <a href="https://www.flgov.com/wp-content/uploads/orders/2020/EO_20-120.pdf">https://www.flgov.com/wp-content/uploads/orders/2020/EO_20-120.pdf</a></li> </ul>                                                                                                                                                                                                                                                                                                                                                                                                            |
| Florida              | 5/18/2020 | ✓ | ✓ | ✓ |   |   |   |  | <ul style="list-style-type: none"> <li>• <a href="https://www.flgov.com/wp-content/uploads/orders/2020/EO_20-123.pdf">https://www.flgov.com/wp-content/uploads/orders/2020/EO_20-123.pdf</a></li> </ul>                                                                                                                                                                                                                                                                                                                                                                                                            |

|          |           |   |   |   |   |   |   |  |                                                                                                                                                                                                                                                                                                                                                                                                                                                                                                                                                                                                                  |
|----------|-----------|---|---|---|---|---|---|--|------------------------------------------------------------------------------------------------------------------------------------------------------------------------------------------------------------------------------------------------------------------------------------------------------------------------------------------------------------------------------------------------------------------------------------------------------------------------------------------------------------------------------------------------------------------------------------------------------------------|
| Florida  | 5/22/2020 | ✓ |   |   |   |   |   |  | <ul style="list-style-type: none"> <li>• <a href="https://www.flgov.com/wp-content/uploads/orders/2020/EO_20-131.pdf">https://www.flgov.com/wp-content/uploads/orders/2020/EO_20-131.pdf</a></li> </ul>                                                                                                                                                                                                                                                                                                                                                                                                          |
| Georgia  | 4/24/2020 |   | ✓ | ✓ |   |   |   |  | <ul style="list-style-type: none"> <li>• <a href="https://gov.georgia.gov/executive-action/executive-orders/2020-executive-orders">https://gov.georgia.gov/executive-action/executive-orders/2020-executive-orders</a></li> </ul>                                                                                                                                                                                                                                                                                                                                                                                |
| Georgia  | 5/1/2020  |   | ✓ | ✓ | ✓ |   | ✓ |  | <ul style="list-style-type: none"> <li>• <a href="https://gov.georgia.gov/executive-action/executive-orders/2020-executive-orders">https://gov.georgia.gov/executive-action/executive-orders/2020-executive-orders</a></li> </ul>                                                                                                                                                                                                                                                                                                                                                                                |
| Georgia  | 5/31/2020 | ✓ |   |   |   |   |   |  | <ul style="list-style-type: none"> <li>• <a href="https://gov.georgia.gov/executive-action/executive-orders/2020-executive-orders">https://gov.georgia.gov/executive-action/executive-orders/2020-executive-orders</a></li> </ul>                                                                                                                                                                                                                                                                                                                                                                                |
| Hawaii   | 5/7/2020  | ✓ | ✓ | ✓ |   |   | ✓ |  | <ul style="list-style-type: none"> <li>• <a href="https://governor.hawaii.gov/newsroom/latest-news/governors-office-news-release-gov-ige-gives-first-round-of-businesses-greenlight-to-re-open/">https://governor.hawaii.gov/newsroom/latest-news/governors-office-news-release-gov-ige-gives-first-round-of-businesses-greenlight-to-re-open/</a></li> <li>• <a href="https://governor.hawaii.gov/newsroom/latest-news/dlnr-news-release-select-state-parks-re-opening-may-6-2020/">https://governor.hawaii.gov/newsroom/latest-news/dlnr-news-release-select-state-parks-re-opening-may-6-2020/</a></li> </ul> |
| Hawaii   | 5/28/2020 |   | ✓ | ✓ | ✓ | ✓ |   |  | <ul style="list-style-type: none"> <li>• <a href="https://governor.hawaii.gov/newsroom/latest-news/office-of-the-governor-news-release-governor-ige-approves-request-to-safety-re-open-more-businesses-across-the-state/">https://governor.hawaii.gov/newsroom/latest-news/office-of-the-governor-news-release-governor-ige-approves-request-to-safety-re-open-more-businesses-across-the-state/</a></li> </ul>                                                                                                                                                                                                  |
| Hawaii   | 5/29/2020 |   | ✓ | ✓ |   |   |   |  | <ul style="list-style-type: none"> <li>• <a href="https://governor.hawaii.gov/newsroom/latest-news/office-of-the-governor-news-release-governor-ige-approves-request-to-safety-re-open-more-businesses-across-the-state/">https://governor.hawaii.gov/newsroom/latest-news/office-of-the-governor-news-release-governor-ige-approves-request-to-safety-re-open-more-businesses-across-the-state/</a></li> </ul>                                                                                                                                                                                                  |
| Hawaii   | 5/31/2020 |   |   |   |   |   | ✓ |  | <ul style="list-style-type: none"> <li>• <a href="https://governor.hawaii.gov/newsroom/latest-news/governors-office-news-release-gov-ige-extends-stay-at-home-order-across-the-state-through-may-31/">https://governor.hawaii.gov/newsroom/latest-news/governors-office-news-release-gov-ige-extends-stay-at-home-order-across-the-state-through-may-31/</a></li> </ul>                                                                                                                                                                                                                                          |
| Idaho    | 5/1/2020  |   | ✓ |   | ✓ |   | ✓ |  | <ul style="list-style-type: none"> <li>• <a href="https://coronavirus.idaho.gov/wp-content/uploads/2020/04/stay-healthy-order-stage1.pdf">https://coronavirus.idaho.gov/wp-content/uploads/2020/04/stay-healthy-order-stage1.pdf</a></li> </ul>                                                                                                                                                                                                                                                                                                                                                                  |
| Idaho    | 5/16/2020 |   | ✓ | ✓ |   |   |   |  | <ul style="list-style-type: none"> <li>• <a href="https://rebound.idaho.gov/stages-of-reopening/">https://rebound.idaho.gov/stages-of-reopening/</a></li> </ul>                                                                                                                                                                                                                                                                                                                                                                                                                                                  |
| Idaho    | 5/30/2020 |   | ✓ |   | ✓ |   |   |  | <ul style="list-style-type: none"> <li>• <a href="https://rebound.idaho.gov/stages-of-reopening/">https://rebound.idaho.gov/stages-of-reopening/</a></li> </ul>                                                                                                                                                                                                                                                                                                                                                                                                                                                  |
| Illinois | 5/1/2020  |   |   |   |   |   | ✓ |  | <ul style="list-style-type: none"> <li>• <a href="https://www2.illinois.gov/Pages/Executive-Orders/ExecutiveOrder2020-32.aspx">https://www2.illinois.gov/Pages/Executive-Orders/ExecutiveOrder2020-32.aspx</a></li> </ul>                                                                                                                                                                                                                                                                                                                                                                                        |
| Illinois |           | ✓ | ✓ | ✓ |   |   | ✓ |  | <ul style="list-style-type: none"> <li>• <a href="https://www2.illinois.gov/Pages/Executive-Orders/ExecutiveOrder2020-38.aspx">https://www2.illinois.gov/Pages/Executive-Orders/ExecutiveOrder2020-38.aspx</a></li> </ul>                                                                                                                                                                                                                                                                                                                                                                                        |
| Indiana  | 5/4/2020  |   | ✓ | ✓ |   | ✓ | ✓ |  | <ul style="list-style-type: none"> <li>• <a href="https://www.in.gov/gov/files/Executive%20Order%2020-26%20Roadmap%20to%20Reopen%20Indiana.pdf">https://www.in.gov/gov/files/Executive%20Order%2020-26%20Roadmap%20to%20Reopen%20Indiana.pdf</a></li> </ul>                                                                                                                                                                                                                                                                                                                                                      |
| Indiana  | 5/8/2020  |   |   |   | ✓ |   |   |  | <ul style="list-style-type: none"> <li>• <a href="https://www.in.gov/gov/files/Executive%20Order%2020-26%20Roadmap%20to%20Reopen%20Indiana.pdf">https://www.in.gov/gov/files/Executive%20Order%2020-26%20Roadmap%20to%20Reopen%20Indiana.pdf</a></li> </ul>                                                                                                                                                                                                                                                                                                                                                      |
| Indiana  | 5/11/2020 |   | ✓ | ✓ |   |   |   |  | <ul style="list-style-type: none"> <li>• <a href="https://www.in.gov/gov/files/Executive%20Order%2020-26%20Roadmap%20to%20Reopen%20Indiana.pdf">https://www.in.gov/gov/files/Executive%20Order%2020-26%20Roadmap%20to%20Reopen%20Indiana.pdf</a></li> </ul>                                                                                                                                                                                                                                                                                                                                                      |
| Indiana  | 5/22/2020 |   | ✓ | ✓ | ✓ | ✓ |   |  | <ul style="list-style-type: none"> <li>• <a href="https://www.in.gov/gov/files/Executive%20Order%2020-28%20(Reopen%20Stage3).pdf">https://www.in.gov/gov/files/Executive%20Order%2020-28%20(Reopen%20Stage3).pdf</a></li> </ul>                                                                                                                                                                                                                                                                                                                                                                                  |
| Indiana  | 6/1/2020  | ✓ |   |   |   |   |   |  | <ul style="list-style-type: none"> <li>• <a href="https://www.in.gov/gov/files/Executive%20Order%2020-28%20(Reopen%20Stage3).pdf">https://www.in.gov/gov/files/Executive%20Order%2020-28%20(Reopen%20Stage3).pdf</a></li> </ul>                                                                                                                                                                                                                                                                                                                                                                                  |
| Iowa     | 5/1/2020  |   | ✓ | ✓ |   |   |   |  | <ul style="list-style-type: none"> <li>• <a href="https://governor.iowa.gov/sites/default/files/documents/Public%20Health%20Proclamation%20-%202020.04.27%20-%20Pt%201.pdf">https://governor.iowa.gov/sites/default/files/documents/Public%20Health%20Proclamation%20-%202020.04.27%20-%20Pt%201.pdf</a></li> </ul>                                                                                                                                                                                                                                                                                              |
| Iowa     | 5/28/2020 |   | ✓ | ✓ |   |   |   |  | <ul style="list-style-type: none"> <li>• <a href="https://governor.iowa.gov/sites/default/files/documents/Public%20Health%20Proclamation%20-%202020.05.26%20%281%29.pdf">https://governor.iowa.gov/sites/default/files/documents/Public%20Health%20Proclamation%20-%202020.05.26%20%281%29.pdf</a></li> </ul>                                                                                                                                                                                                                                                                                                    |
| Iowa     | 6/1/2020  |   | ✓ | ✓ | ✓ | ✓ |   |  | <ul style="list-style-type: none"> <li>• <a href="https://governor.iowa.gov/sites/default/files/documents/Public%20Health%20Proclamation%20-%202020.05.26%20%281%29.pdf">https://governor.iowa.gov/sites/default/files/documents/Public%20Health%20Proclamation%20-%202020.05.26%20%281%29.pdf</a></li> </ul>                                                                                                                                                                                                                                                                                                    |
| Kansas   | 5/4/2020  |   | ✓ | ✓ |   |   | ✓ |  | <ul style="list-style-type: none"> <li>• <a href="https://governor.kansas.gov/wp-content/uploads/2020/04/EO-20-24-Executed.pdf">https://governor.kansas.gov/wp-content/uploads/2020/04/EO-20-24-Executed.pdf</a></li> <li>• <a href="https://governor.kansas.gov/wp-content/uploads/2020/04/EO-20-29-Implementing-Phase-One-of-Ad-Astra-Plan.pdf">https://governor.kansas.gov/wp-content/uploads/2020/04/EO-20-29-Implementing-Phase-One-of-Ad-Astra-Plan.pdf</a></li> </ul>                                                                                                                                     |
| Kansas   | 5/18/2020 |   | ✓ | ✓ | ✓ |   |   |  | <ul style="list-style-type: none"> <li>• <a href="https://governor.kansas.gov/wp-content/uploads/2020/05/EO-20-31-Implementing-Phase-1.5-of-Ad-Astra-Plan-Executed.pdf">https://governor.kansas.gov/wp-content/uploads/2020/05/EO-20-31-Implementing-Phase-1.5-of-Ad-Astra-Plan-Executed.pdf</a></li> </ul>                                                                                                                                                                                                                                                                                                      |
| Kansas   | 5/22/2020 |   | ✓ | ✓ | ✓ |   |   |  | <ul style="list-style-type: none"> <li>• <a href="https://governor.kansas.gov/wp-content/uploads/2020/05/EO-20-34-Implementing-Phase-2-Executed.pdf">https://governor.kansas.gov/wp-content/uploads/2020/05/EO-20-34-Implementing-Phase-2-Executed.pdf</a></li> </ul>                                                                                                                                                                                                                                                                                                                                            |

|               |           |   |   |   |   |                                                                                                                                                                                                                                                                                                                                                                                                                                                                                                                                                                                                        |
|---------------|-----------|---|---|---|---|--------------------------------------------------------------------------------------------------------------------------------------------------------------------------------------------------------------------------------------------------------------------------------------------------------------------------------------------------------------------------------------------------------------------------------------------------------------------------------------------------------------------------------------------------------------------------------------------------------|
| Kentucky      | 5/9/2020  |   |   |   | ✓ | <ul style="list-style-type: none"> <li>• <a href="https://govsite-assets.s3.amazonaws.com/1MQt8kIS5mNcotBuzdmb_Healthy%20at%20Work%20Reqs%20-%20Places%20of%20Worship%20-%20Final%20Version%201.1%20Final-1-.pdf">https://govsite-assets.s3.amazonaws.com/1MQt8kIS5mNcotBuzdmb_Healthy%20at%20Work%20Reqs%20-%20Places%20of%20Worship%20-%20Final%20Version%201.1%20Final-1-.pdf</a></li> </ul>                                                                                                                                                                                                        |
| Kentucky      | 5/11/2020 | ✓ | ✓ |   |   | <ul style="list-style-type: none"> <li>• <a href="https://govstatus.egov.com/ky-healthy-at-work">https://govstatus.egov.com/ky-healthy-at-work</a></li> <li>• <a href="https://kentucky.gov/Pages/Activity-stream.aspx?n=GovernorBeshear&amp;prId=148">https://kentucky.gov/Pages/Activity-stream.aspx?n=GovernorBeshear&amp;prId=148</a></li> </ul>                                                                                                                                                                                                                                                   |
| Kentucky      | 5/20/2020 | ✓ | ✓ | ✓ |   | <ul style="list-style-type: none"> <li>• <a href="https://govstatus.egov.com/ky-healthy-at-work">https://govstatus.egov.com/ky-healthy-at-work</a></li> <li>• <a href="https://kentucky.gov/Pages/Activity-stream.aspx?n=GovernorBeshear&amp;prId=148">https://kentucky.gov/Pages/Activity-stream.aspx?n=GovernorBeshear&amp;prId=148</a></li> </ul>                                                                                                                                                                                                                                                   |
| Kentucky      | 5/25/2020 | ✓ | ✓ |   |   | <ul style="list-style-type: none"> <li>• <a href="https://govstatus.egov.com/ky-healthy-at-work">https://govstatus.egov.com/ky-healthy-at-work</a></li> <li>• <a href="https://kentucky.gov/Pages/Activity-stream.aspx?n=GovernorBeshear&amp;prId=148">https://kentucky.gov/Pages/Activity-stream.aspx?n=GovernorBeshear&amp;prId=148</a></li> </ul>                                                                                                                                                                                                                                                   |
| Kentucky      | 6/1/2020  | ✓ | ✓ | ✓ |   | <ul style="list-style-type: none"> <li>• <a href="https://govsite-assets.s3.amazonaws.com/QwSW34JQkOSNDQhBtNLA_6-3-2020,%20CHFS%20Amended%20Order.pdf">https://govsite-assets.s3.amazonaws.com/QwSW34JQkOSNDQhBtNLA_6-3-2020,%20CHFS%20Amended%20Order.pdf</a></li> </ul>                                                                                                                                                                                                                                                                                                                              |
| Louisiana     | 5/15/2020 | ✓ | ✓ | ✓ | ✓ | <ul style="list-style-type: none"> <li>• <a href="https://gov.louisiana.gov/assets/Proclamations/2020/58-JBE-2020.pdf">https://gov.louisiana.gov/assets/Proclamations/2020/58-JBE-2020.pdf</a></li> </ul>                                                                                                                                                                                                                                                                                                                                                                                              |
| Maine         | 5/1/2020  | ✓ | ✓ |   | ✓ | <ul style="list-style-type: none"> <li>• <a href="https://www.maine.gov/covid19/restartingmaine">https://www.maine.gov/covid19/restartingmaine</a></li> <li>• <a href="https://www.maine.gov/governor/mills/sites/maine.gov.governor.mills/files/inline-files/An%20Order%20to%20Stay%20Safer%20at%20Home.pdf">https://www.maine.gov/governor/mills/sites/maine.gov.governor.mills/files/inline-files/An%20Order%20to%20Stay%20Safer%20at%20Home.pdf</a></li> </ul>                                                                                                                                     |
| Maine         | 6/1/2020  | ✓ | ✓ | ✓ | ✓ | <ul style="list-style-type: none"> <li>• <a href="https://www.maine.gov/governor/mills/sites/maine.gov.governor.mills/files/inline-files/An%20Order%20to%20Further%20Implement%20the%20Restarting%20Plan.pdf">https://www.maine.gov/governor/mills/sites/maine.gov.governor.mills/files/inline-files/An%20Order%20to%20Further%20Implement%20the%20Restarting%20Plan.pdf</a></li> </ul>                                                                                                                                                                                                                |
| Maryland      | 5/15/2020 | ✓ | ✓ | ✓ | ✓ | <ul style="list-style-type: none"> <li>• <a href="https://governor.maryland.gov/2020/05/13/stage-one-governor-hogan-announces-gradual-reopenings-with-flexible-community-based-approach/">https://governor.maryland.gov/2020/05/13/stage-one-governor-hogan-announces-gradual-reopenings-with-flexible-community-based-approach/</a></li> </ul>                                                                                                                                                                                                                                                        |
| Maryland      | 5/27/2020 | ✓ | ✓ |   | ✓ | <ul style="list-style-type: none"> <li>• <a href="https://governor.maryland.gov/wp-content/uploads/2020/05/Gatherings-7th-AMENDED-5.27.20.pdf">https://governor.maryland.gov/wp-content/uploads/2020/05/Gatherings-7th-AMENDED-5.27.20.pdf</a></li> </ul>                                                                                                                                                                                                                                                                                                                                              |
| Maryland      | 5/29/2020 | ✓ |   | ✓ | ✓ | <ul style="list-style-type: none"> <li>• <a href="https://governor.maryland.gov/2020/05/27/governor-hogan-announces-resumption-of-outdoor-dining-additional-activities-to-complete-stage-one-of-recovery/">https://governor.maryland.gov/2020/05/27/governor-hogan-announces-resumption-of-outdoor-dining-additional-activities-to-complete-stage-one-of-recovery/</a></li> <li>• <a href="https://governor.maryland.gov/wp-content/uploads/2020/05/Alcohol-Services-AMENDED-5.29.20.pdf">https://governor.maryland.gov/wp-content/uploads/2020/05/Alcohol-Services-AMENDED-5.29.20.pdf</a></li> </ul> |
| Massachusetts | 5/18/2020 | ✓ |   | ✓ | ✓ | <ul style="list-style-type: none"> <li>• <a href="https://www.mass.gov/info-details/reopening-when-can-my-business-reopen">https://www.mass.gov/info-details/reopening-when-can-my-business-reopen</a></li> <li>• <a href="https://www.mass.gov/news/safer-at-home-advisory">https://www.mass.gov/news/safer-at-home-advisory</a></li> </ul>                                                                                                                                                                                                                                                           |
| Massachusetts | 5/25/2020 | ✓ | ✓ |   | ✓ | <ul style="list-style-type: none"> <li>• <a href="https://www.mass.gov/doc/may-18-2020-expanded-beach-access/download">https://www.mass.gov/doc/may-18-2020-expanded-beach-access/download</a></li> <li>• <a href="https://www.mass.gov/info-details/reopening-when-can-my-business-reopen">https://www.mass.gov/info-details/reopening-when-can-my-business-reopen</a></li> </ul>                                                                                                                                                                                                                     |
| Michigan      | 4/24/2020 | ✓ | ✓ |   | ✓ | <ul style="list-style-type: none"> <li>• <a href="https://www.michigan.gov/whitmer/0,9309,7-387-90499_90705-526894--,00.html">https://www.michigan.gov/whitmer/0,9309,7-387-90499_90705-526894--,00.html</a></li> </ul>                                                                                                                                                                                                                                                                                                                                                                                |
| Michigan      | 5/7/2020  | ✓ |   |   |   | <ul style="list-style-type: none"> <li>• <a href="https://content.govdelivery.com/attachments/MIEOG/2020/05/01/file_attachments/1441315/EO%202020-70.pdf">https://content.govdelivery.com/attachments/MIEOG/2020/05/01/file_attachments/1441315/EO%202020-70.pdf</a></li> </ul>                                                                                                                                                                                                                                                                                                                        |
| Michigan      | 5/11/2020 | ✓ |   |   |   | <ul style="list-style-type: none"> <li>• <a href="https://content.govdelivery.com/attachments/MIEOG/2020/05/07/file_attachments/1446124/EO%202020-77.pdf">https://content.govdelivery.com/attachments/MIEOG/2020/05/07/file_attachments/1446124/EO%202020-77.pdf</a></li> </ul>                                                                                                                                                                                                                                                                                                                        |
| Michigan      | 5/18/2020 | ✓ |   |   |   | <ul style="list-style-type: none"> <li>• <a href="https://content.govdelivery.com/attachments/MIEOG/2020/05/18/file_attachments/1453894/EO%202020-92.pdf">https://content.govdelivery.com/attachments/MIEOG/2020/05/18/file_attachments/1453894/EO%202020-92.pdf</a></li> </ul>                                                                                                                                                                                                                                                                                                                        |
| Michigan      | 6/1/2020  |   | ✓ | ✓ | ✓ | <ul style="list-style-type: none"> <li>• <a href="https://www.michigan.gov/whitmer/0,9309,7-387-90499_90705-530620--,00.html">https://www.michigan.gov/whitmer/0,9309,7-387-90499_90705-530620--,00.html</a></li> </ul>                                                                                                                                                                                                                                                                                                                                                                                |
| Michigan      | 6/4/2020  | ✓ | ✓ |   |   | <ul style="list-style-type: none"> <li>• <a href="https://www.michigan.gov/whitmer/0,9309,7-387-90499_90705-530620--,00.html">https://www.michigan.gov/whitmer/0,9309,7-387-90499_90705-530620--,00.html</a></li> </ul>                                                                                                                                                                                                                                                                                                                                                                                |
| Minnesota     | 4/24/2020 | ✓ |   |   |   | <ul style="list-style-type: none"> <li>• <a href="https://www.leg.state.mn.us/archive/execorders/20-40.pdf">https://www.leg.state.mn.us/archive/execorders/20-40.pdf</a></li> </ul>                                                                                                                                                                                                                                                                                                                                                                                                                    |
| Minnesota     | 5/17/2020 | ✓ |   | ✓ | ✓ | <ul style="list-style-type: none"> <li>• <a href="https://www.leg.state.mn.us/archive/execorders/20-56.pdf">https://www.leg.state.mn.us/archive/execorders/20-56.pdf</a></li> </ul>                                                                                                                                                                                                                                                                                                                                                                                                                    |
| Minnesota     | 5/26/2020 |   |   | ✓ |   | <ul style="list-style-type: none"> <li>• <a href="https://www.leg.state.mn.us/archive/execorders/20-62.pdf">https://www.leg.state.mn.us/archive/execorders/20-62.pdf</a></li> </ul>                                                                                                                                                                                                                                                                                                                                                                                                                    |
| Minnesota     | 5/27/2020 | ✓ | ✓ | ✓ |   | <ul style="list-style-type: none"> <li>• <a href="https://www.leg.state.mn.us/archive/execorders/20-63.pdf">https://www.leg.state.mn.us/archive/execorders/20-63.pdf</a></li> </ul>                                                                                                                                                                                                                                                                                                                                                                                                                    |

|               |           |   |   |   |   |   |                                                                                                                                                                                                                                                                                                                                                                                                                                                                                                                                                                                                                                                                                                                                                                                                                                                                                                                                                                                                                                                                                                                                                                                                                                                                                                                      |
|---------------|-----------|---|---|---|---|---|----------------------------------------------------------------------------------------------------------------------------------------------------------------------------------------------------------------------------------------------------------------------------------------------------------------------------------------------------------------------------------------------------------------------------------------------------------------------------------------------------------------------------------------------------------------------------------------------------------------------------------------------------------------------------------------------------------------------------------------------------------------------------------------------------------------------------------------------------------------------------------------------------------------------------------------------------------------------------------------------------------------------------------------------------------------------------------------------------------------------------------------------------------------------------------------------------------------------------------------------------------------------------------------------------------------------|
| Minnesota     | 6/2/2020  |   | ✓ |   |   |   | <ul style="list-style-type: none"> <li>• <a href="https://www.leg.state.mn.us/archive/execorders/20-63.pdf">https://www.leg.state.mn.us/archive/execorders/20-63.pdf</a></li> </ul>                                                                                                                                                                                                                                                                                                                                                                                                                                                                                                                                                                                                                                                                                                                                                                                                                                                                                                                                                                                                                                                                                                                                  |
| Mississippi   | 4/27/2020 | ✓ | ✓ | ✓ |   |   | <ul style="list-style-type: none"> <li>• <a href="https://www.sos.ms.gov/content/executiveorders/ExecutiveOrders/1477.pdf">https://www.sos.ms.gov/content/executiveorders/ExecutiveOrders/1477.pdf</a></li> </ul>                                                                                                                                                                                                                                                                                                                                                                                                                                                                                                                                                                                                                                                                                                                                                                                                                                                                                                                                                                                                                                                                                                    |
| Mississippi   | 5/8/2020  | ✓ | ✓ |   |   |   | <ul style="list-style-type: none"> <li>• <a href="https://www.sos.ms.gov/content/executiveorders/ExecutiveOrders/1480.pdf">https://www.sos.ms.gov/content/executiveorders/ExecutiveOrders/1480.pdf</a></li> </ul>                                                                                                                                                                                                                                                                                                                                                                                                                                                                                                                                                                                                                                                                                                                                                                                                                                                                                                                                                                                                                                                                                                    |
| Mississippi   | 5/22/2020 | ✓ |   | ✓ | ✓ |   | <ul style="list-style-type: none"> <li>• <a href="https://www.sos.ms.gov/content/executiveorders/ExecutiveOrders/1487.pdf">https://www.sos.ms.gov/content/executiveorders/ExecutiveOrders/1487.pdf</a></li> </ul>                                                                                                                                                                                                                                                                                                                                                                                                                                                                                                                                                                                                                                                                                                                                                                                                                                                                                                                                                                                                                                                                                                    |
| Mississippi   | 6/1/2020  | ✓ | ✓ | ✓ | ✓ |   | <ul style="list-style-type: none"> <li>• <a href="https://www.sos.ms.gov/content/executiveorders/ExecutiveOrders/1491.pdf">https://www.sos.ms.gov/content/executiveorders/ExecutiveOrders/1491.pdf</a></li> <li>• <a href="https://www.sos.ms.gov/content/executiveorders/ExecutiveOrders/1492.pdf">https://www.sos.ms.gov/content/executiveorders/ExecutiveOrders/1492.pdf</a></li> </ul>                                                                                                                                                                                                                                                                                                                                                                                                                                                                                                                                                                                                                                                                                                                                                                                                                                                                                                                           |
| Missouri      | 5/4/2020  | ✓ | ✓ |   | ✓ |   | <ul style="list-style-type: none"> <li>• <a href="https://governor.mo.gov/priorities/extension-stay-home-order-covid-19">https://governor.mo.gov/priorities/extension-stay-home-order-covid-19</a></li> <li>• <a href="https://health.mo.gov/living/healthcondiseases/communicable/novel-coronavirus/pdf/economic-reopening.pdf">https://health.mo.gov/living/healthcondiseases/communicable/novel-coronavirus/pdf/economic-reopening.pdf</a></li> </ul>                                                                                                                                                                                                                                                                                                                                                                                                                                                                                                                                                                                                                                                                                                                                                                                                                                                             |
| Montana       | 4/26/2020 |   |   | ✓ | ✓ |   | <ul style="list-style-type: none"> <li>• <a href="https://covid19.mt.gov/Portals/223/Documents/04-22-20%20Directive%20and%20Appx%20-%20Reopening%20Phase%20One.pdf?ver=2020-04-22-124954-977">https://covid19.mt.gov/Portals/223/Documents/04-22-20%20Directive%20and%20Appx%20-%20Reopening%20Phase%20One.pdf?ver=2020-04-22-124954-977</a></li> </ul>                                                                                                                                                                                                                                                                                                                                                                                                                                                                                                                                                                                                                                                                                                                                                                                                                                                                                                                                                              |
| Montana       | 4/27/2020 | ✓ | ✓ |   | ✓ |   | <ul style="list-style-type: none"> <li>• <a href="https://covid19.mt.gov/Portals/223/Documents/04-22-20%20Directive%20and%20Appx%20-%20Reopening%20Phase%20One.pdf?ver=2020-04-22-124954-977">https://covid19.mt.gov/Portals/223/Documents/04-22-20%20Directive%20and%20Appx%20-%20Reopening%20Phase%20One.pdf?ver=2020-04-22-124954-977</a></li> </ul>                                                                                                                                                                                                                                                                                                                                                                                                                                                                                                                                                                                                                                                                                                                                                                                                                                                                                                                                                              |
| Montana       | 5/4/2020  | ✓ | ✓ |   |   |   | <ul style="list-style-type: none"> <li>• <a href="https://covid19.mt.gov/Portals/223/Documents/04-22-20%20Directive%20and%20Appx%20-%20Reopening%20Phase%20One.pdf?ver=2020-04-22-124954-977">https://covid19.mt.gov/Portals/223/Documents/04-22-20%20Directive%20and%20Appx%20-%20Reopening%20Phase%20One.pdf?ver=2020-04-22-124954-977</a></li> </ul>                                                                                                                                                                                                                                                                                                                                                                                                                                                                                                                                                                                                                                                                                                                                                                                                                                                                                                                                                              |
| Montana       | 5/7/2020  | ✓ |   |   |   |   | <ul style="list-style-type: none"> <li>• <a href="https://covid19.mt.gov/Portals/223/Documents/04-22-20%20Directive%20and%20Appx%20-%20Reopening%20Phase%20One.pdf?ver=2020-04-22-124954-977">https://covid19.mt.gov/Portals/223/Documents/04-22-20%20Directive%20and%20Appx%20-%20Reopening%20Phase%20One.pdf?ver=2020-04-22-124954-977</a></li> </ul>                                                                                                                                                                                                                                                                                                                                                                                                                                                                                                                                                                                                                                                                                                                                                                                                                                                                                                                                                              |
| Montana       | 5/15/2020 | ✓ | ✓ | ✓ |   |   | <ul style="list-style-type: none"> <li>• <a href="https://covid19.mt.gov/Portals/223/Documents/Phase%20One%20Expansion%20Plus%20Guidance.pdf?ver=2020-05-08-150423-113">https://covid19.mt.gov/Portals/223/Documents/Phase%20One%20Expansion%20Plus%20Guidance.pdf?ver=2020-05-08-150423-113</a></li> </ul>                                                                                                                                                                                                                                                                                                                                                                                                                                                                                                                                                                                                                                                                                                                                                                                                                                                                                                                                                                                                          |
| Montana       | 6/1/2020  | ✓ | ✓ | ✓ |   | ✓ | <ul style="list-style-type: none"> <li>• <a href="https://covid19.mt.gov/Portals/223/Documents/Phase%20Two%20Directive%20with%20Appendices.pdf?ver=2020-05-19-145442-350">https://covid19.mt.gov/Portals/223/Documents/Phase%20Two%20Directive%20with%20Appendices.pdf?ver=2020-05-19-145442-350</a></li> </ul>                                                                                                                                                                                                                                                                                                                                                                                                                                                                                                                                                                                                                                                                                                                                                                                                                                                                                                                                                                                                      |
| Nebraska      | 6/1/2020  | ✓ | ✓ | ✓ | ✓ |   | <ul style="list-style-type: none"> <li>• <a href="http://dhhs.ne.gov/Documents/COVID-19-Restaurant-In-Room-Dining-Reopening-Guidelines.pdf">http://dhhs.ne.gov/Documents/COVID-19-Restaurant-In-Room-Dining-Reopening-Guidelines.pdf</a></li> <li>• <a href="http://dhhs.ne.gov/Documents/COVID-19-Guidelines-for-the-Conduct-of-Faith-Based-Services.pdf">http://dhhs.ne.gov/Documents/COVID-19-Guidelines-for-the-Conduct-of-Faith-Based-Services.pdf</a></li> <li>• <a href="http://dhhs.ne.gov/Documents/COVID-19-Recommended-Best-Practices-for-Body-Art-Piercing-and-Tattooing.pdf">http://dhhs.ne.gov/Documents/COVID-19-Recommended-Best-Practices-for-Body-Art-Piercing-and-Tattooing.pdf</a></li> <li>• <a href="http://dhhs.ne.gov/Documents/COVID-19-Recommended-Best-Practices-for-Barbers-and-Salons.pdf">http://dhhs.ne.gov/Documents/COVID-19-Recommended-Best-Practices-for-Barbers-and-Salons.pdf</a></li> <li>• <a href="http://dhhs.ne.gov/Documents/COVID-19-Youth-Day-Camps-Guidance.pdf">http://dhhs.ne.gov/Documents/COVID-19-Youth-Day-Camps-Guidance.pdf</a></li> <li>• <a href="http://dhhs.ne.gov/Documents/COVID-19-Outdoor-Stadium-Arena-and-Racetrack-Event-Guidance.pdf">http://dhhs.ne.gov/Documents/COVID-19-Outdoor-Stadium-Arena-and-Racetrack-Event-Guidance.pdf</a></li> </ul> |
| Nevada        | 5/9/2020  | ✓ | ✓ |   | ✓ |   | <ul style="list-style-type: none"> <li>• <a href="https://nvhealthresponse.nv.gov/wp-content/uploads/2020/05/Roadmap-to-Recovery-Phase-One-Initial-Guidance.pdf">https://nvhealthresponse.nv.gov/wp-content/uploads/2020/05/Roadmap-to-Recovery-Phase-One-Initial-Guidance.pdf</a></li> </ul>                                                                                                                                                                                                                                                                                                                                                                                                                                                                                                                                                                                                                                                                                                                                                                                                                                                                                                                                                                                                                        |
| Nevada        | 5/29/2020 | ✓ | ✓ | ✓ |   |   | <ul style="list-style-type: none"> <li>• <a href="http://gov.nv.gov/News/Press/2020/Governor_Sisolak_Releases_Prepared_Remarks_Guidance_for_Phase_2_Reopening_Plans_Press_Call/">http://gov.nv.gov/News/Press/2020/Governor_Sisolak_Releases_Prepared_Remarks_Guidance_for_Phase_2_Reopening_Plans_Press_Call/</a></li> <li>• <a href="https://twitter.com/GovSisolak/status/1265500829190103041?s=20">https://twitter.com/GovSisolak/status/1265500829190103041?s=20</a></li> </ul>                                                                                                                                                                                                                                                                                                                                                                                                                                                                                                                                                                                                                                                                                                                                                                                                                                 |
| New Hampshire | 5/11/2020 | ✓ | ✓ |   | ✓ |   | <ul style="list-style-type: none"> <li>• <a href="https://www.governor.nh.gov/news-media/press-2020/20200501-stay-at-home.htm">https://www.governor.nh.gov/news-media/press-2020/20200501-stay-at-home.htm</a></li> </ul>                                                                                                                                                                                                                                                                                                                                                                                                                                                                                                                                                                                                                                                                                                                                                                                                                                                                                                                                                                                                                                                                                            |
| New Hampshire | 5/18/2020 |   | ✓ |   |   |   | <ul style="list-style-type: none"> <li>• <a href="https://www.governor.nh.gov/news-media/press-2020/20200501-stay-at-home.htm">https://www.governor.nh.gov/news-media/press-2020/20200501-stay-at-home.htm</a></li> <li>• <a href="https://twitter.com/GovChrisSununu/status/1256308431964733443?s=20">https://twitter.com/GovChrisSununu/status/1256308431964733443?s=20</a></li> </ul>                                                                                                                                                                                                                                                                                                                                                                                                                                                                                                                                                                                                                                                                                                                                                                                                                                                                                                                             |
| New Hampshire | 5/22/2020 |   |   |   | ✓ |   | <ul style="list-style-type: none"> <li>• <a href="https://twitter.com/GovChrisSununu/status/1263912659696660486?s=20">https://twitter.com/GovChrisSununu/status/1263912659696660486?s=20</a></li> </ul>                                                                                                                                                                                                                                                                                                                                                                                                                                                                                                                                                                                                                                                                                                                                                                                                                                                                                                                                                                                                                                                                                                              |
| New Hampshire | 5/29/2020 |   |   | ✓ |   |   | <ul style="list-style-type: none"> <li>• <a href="https://twitter.com/GovChrisSununu/status/1266449524060573699?s=20">https://twitter.com/GovChrisSununu/status/1266449524060573699?s=20</a></li> </ul>                                                                                                                                                                                                                                                                                                                                                                                                                                                                                                                                                                                                                                                                                                                                                                                                                                                                                                                                                                                                                                                                                                              |



|                |           |   |   |   |                                                                                                                                                                                                                                                                                                                                                                                                                                                                                                                                       |
|----------------|-----------|---|---|---|---------------------------------------------------------------------------------------------------------------------------------------------------------------------------------------------------------------------------------------------------------------------------------------------------------------------------------------------------------------------------------------------------------------------------------------------------------------------------------------------------------------------------------------|
| New Hampshire  | 6/1/2020  | ✓ | ✓ | ✓ | <ul style="list-style-type: none"> <li>• <a href="https://twitter.com/GovChrisSununu/status/1263913823075012611?s=20">https://twitter.com/GovChrisSununu/status/1263913823075012611?s=20</a></li> <li>• <a href="https://twitter.com/GovChrisSununu/status/1263915402368868352?s=20">https://twitter.com/GovChrisSununu/status/1263915402368868352?s=20</a></li> <li>• <a href="https://twitter.com/GovChrisSununu/status/1263917324815478784?s=20">https://twitter.com/GovChrisSununu/status/1263917324815478784?s=20</a></li> </ul> |
| New Jersey     | 5/2/2020  |   |   | ✓ | <ul style="list-style-type: none"> <li>• <a href="https://www.nj.gov/infobank/eo/056murphy/pdf/EO-133.pdf">https://www.nj.gov/infobank/eo/056murphy/pdf/EO-133.pdf</a></li> <li>• <a href="https://twitter.com/GovChrisSununu/status/1262464509165408258?s=20">https://twitter.com/GovChrisSununu/status/1262464509165408258?s=20</a></li> </ul>                                                                                                                                                                                      |
| New Jersey     | 5/22/2020 |   | ✓ | ✓ | <ul style="list-style-type: none"> <li>• <a href="https://twitter.com/GovMurphy/status/1260979320102813696?s=20">https://twitter.com/GovMurphy/status/1260979320102813696?s=20</a></li> <li>• <a href="https://nj.gov/governor/news/news/562020/approved/20200514b.shtml">https://nj.gov/governor/news/news/562020/approved/20200514b.shtml</a></li> <li>• <a href="https://nj.gov/governor/news/news/562020/approved/20200522d.shtml">https://nj.gov/governor/news/news/562020/approved/20200522d.shtml</a></li> </ul>               |
| New Mexico     | 4/30/2020 |   |   | ✓ | <ul style="list-style-type: none"> <li>• <a href="https://www.governor.state.nm.us/wp-content/uploads/2020/05/DOH-PHO-4-29-essential-businesses-mass-gatherings-fv.pdf">https://www.governor.state.nm.us/wp-content/uploads/2020/05/DOH-PHO-4-29-essential-businesses-mass-gatherings-fv.pdf</a></li> </ul>                                                                                                                                                                                                                           |
| New Mexico     | 5/1/2020  |   |   | ✓ | <ul style="list-style-type: none"> <li>• <a href="http://www.emnrd.state.nm.us/SPD/Media%20Releases/documents/ParksDayUseAnnouncementFinal.pdf">http://www.emnrd.state.nm.us/SPD/Media%20Releases/documents/ParksDayUseAnnouncementFinal.pdf</a></li> </ul>                                                                                                                                                                                                                                                                           |
| New Mexico     | 5/16/2020 | ✓ | ✓ | ✓ | <ul style="list-style-type: none"> <li>• <a href="https://www.governor.state.nm.us/2020/05/15/governor-signs-modified-extended-public-health-order-easing-some-restrictions-and-requiring-face-coverings/">https://www.governor.state.nm.us/2020/05/15/governor-signs-modified-extended-public-health-order-easing-some-restrictions-and-requiring-face-coverings/</a></li> </ul>                                                                                                                                                     |
| New Mexico     | 5/27/2020 |   | ✓ |   | <ul style="list-style-type: none"> <li>• <a href="https://www.governor.state.nm.us/2020/05/26/state-announces-soft-reopening-for-outdoor-or-patio-services-at-dine-in-restaurants/">https://www.governor.state.nm.us/2020/05/26/state-announces-soft-reopening-for-outdoor-or-patio-services-at-dine-in-restaurants/</a></li> </ul>                                                                                                                                                                                                   |
| New Mexico     | 5/31/2020 | ✓ |   | ✓ | <ul style="list-style-type: none"> <li>• <a href="https://www.governor.state.nm.us/2020/05/13/state-to-further-modify-public-health-emergency-order/">https://www.governor.state.nm.us/2020/05/13/state-to-further-modify-public-health-emergency-order/</a></li> </ul>                                                                                                                                                                                                                                                               |
| New Mexico     | 6/1/2020  | ✓ | ✓ | ✓ | <ul style="list-style-type: none"> <li>• <a href="https://www.governor.state.nm.us/2020/05/28/gov-announces-limited-reopening-for-dine-in-restaurants-in-door-malls-gyms-salons-and-more/">https://www.governor.state.nm.us/2020/05/28/gov-announces-limited-reopening-for-dine-in-restaurants-in-door-malls-gyms-salons-and-more/</a></li> </ul>                                                                                                                                                                                     |
| New York       | 5/21/2020 |   |   | ✓ | <ul style="list-style-type: none"> <li>• <a href="https://www.governor.ny.gov/news/amid-ongoing-covid-19-pandemic-governor-cuomo-announces-results-states-antibody-testing-survey">https://www.governor.ny.gov/news/amid-ongoing-covid-19-pandemic-governor-cuomo-announces-results-states-antibody-testing-survey</a></li> </ul>                                                                                                                                                                                                     |
| New York       | 5/22/2020 |   |   | ✓ | <ul style="list-style-type: none"> <li>• <a href="https://twitter.com/NYGovCuomo/status/1261325280150462468?s=20">https://twitter.com/NYGovCuomo/status/1261325280150462468?s=20</a></li> </ul>                                                                                                                                                                                                                                                                                                                                       |
| New York       | 5/25/2020 |   |   | ✓ | <ul style="list-style-type: none"> <li>• <a href="https://www.governor.ny.gov/news/amid-ongoing-covid-19-pandemic-governor-cuomo-announces-new-york-professional-sports-leagues">https://www.governor.ny.gov/news/amid-ongoing-covid-19-pandemic-governor-cuomo-announces-new-york-professional-sports-leagues</a></li> </ul>                                                                                                                                                                                                         |
| New York       | 5/27/2020 | ✓ |   |   | <ul style="list-style-type: none"> <li>• <a href="https://www.governor.ny.gov/news/amid-ongoing-covid-19-pandemic-governor-cuomo-calls-us-senate-pass-coronavirus-relief-bill">https://www.governor.ny.gov/news/amid-ongoing-covid-19-pandemic-governor-cuomo-calls-us-senate-pass-coronavirus-relief-bill</a></li> </ul>                                                                                                                                                                                                             |
| New York       | 5/29/2020 | ✓ | ✓ |   | <ul style="list-style-type: none"> <li>• <a href="https://www.governor.ny.gov/news/amid-ongoing-covid-19-pandemic-governor-cuomo-announces-new-york-professional-sports-leagues">https://www.governor.ny.gov/news/amid-ongoing-covid-19-pandemic-governor-cuomo-announces-new-york-professional-sports-leagues</a></li> </ul>                                                                                                                                                                                                         |
| North Carolina | 5/8/2020  | ✓ | ✓ | ✓ | <ul style="list-style-type: none"> <li>• <a href="https://files.nc.gov/governor/documents/files/EO138-Phase-1.pdf">https://files.nc.gov/governor/documents/files/EO138-Phase-1.pdf</a></li> </ul>                                                                                                                                                                                                                                                                                                                                     |
| North Carolina | 5/22/2020 | ✓ | ✓ | ✓ | <ul style="list-style-type: none"> <li>• <a href="https://governor.nc.gov/news/key-indicators-remain-stable-north-carolina-moves-safer-home-phase-2">https://governor.nc.gov/news/key-indicators-remain-stable-north-carolina-moves-safer-home-phase-2</a></li> </ul>                                                                                                                                                                                                                                                                 |
| North Dakota   | 5/1/2020  | ✓ | ✓ | ✓ | <ul style="list-style-type: none"> <li>• <a href="https://www.governor.nd.gov/sites/www/files/documents/executive-orders/Executive%20Order%202020-06.4.pdf">https://www.governor.nd.gov/sites/www/files/documents/executive-orders/Executive%20Order%202020-06.4.pdf</a></li> </ul>                                                                                                                                                                                                                                                   |
| North Dakota   | 5/15/2020 |   |   | ✓ | <ul style="list-style-type: none"> <li>• <a href="https://www.governor.nd.gov/news/burgum-releases-guidelines-large-gatherings-events-part-nd-smart-restart-plan">https://www.governor.nd.gov/news/burgum-releases-guidelines-large-gatherings-events-part-nd-smart-restart-plan</a></li> </ul>                                                                                                                                                                                                                                       |
| North Dakota   | 5/21/2020 |   |   | ✓ | <ul style="list-style-type: none"> <li>• <a href="https://www.parkrec.nd.gov/covid-update">https://www.parkrec.nd.gov/covid-update</a></li> </ul>                                                                                                                                                                                                                                                                                                                                                                                     |
| North Dakota   | 5/29/2020 | ✓ | ✓ | ✓ | <ul style="list-style-type: none"> <li>• <a href="https://www.governor.nd.gov/news/burgum-announces-move-next-phase-nd-smart-restart-plan">https://www.governor.nd.gov/news/burgum-announces-move-next-phase-nd-smart-restart-plan</a></li> </ul>                                                                                                                                                                                                                                                                                     |
| Ohio           | 5/4/2020  | ✓ |   |   | <ul style="list-style-type: none"> <li>• <a href="https://coronavirus.ohio.gov/static/publicorders/Directors-Stay-Safe-Ohio-Order.pdf">https://coronavirus.ohio.gov/static/publicorders/Directors-Stay-Safe-Ohio-Order.pdf</a></li> </ul>                                                                                                                                                                                                                                                                                             |
| Ohio           | 5/12/2020 | ✓ | ✓ |   | <ul style="list-style-type: none"> <li>• <a href="https://coronavirus.ohio.gov/static/publicorders/Directors-Stay-Safe-Ohio-Order.pdf">https://coronavirus.ohio.gov/static/publicorders/Directors-Stay-Safe-Ohio-Order.pdf</a></li> </ul>                                                                                                                                                                                                                                                                                             |
| Ohio           | 5/15/2020 | ✓ | ✓ |   | <ul style="list-style-type: none"> <li>• <a href="https://governor.ohio.gov/wps/portal/gov/governor/media/news-and-media/covid19-update-may-7-2020">https://governor.ohio.gov/wps/portal/gov/governor/media/news-and-media/covid19-update-may-7-2020</a></li> </ul>                                                                                                                                                                                                                                                                   |

|                |           |   |   |   |                                                                                                                                                                                                                                                                                                                                                                                                                                                                                                                                                                                                                                                                                              |
|----------------|-----------|---|---|---|----------------------------------------------------------------------------------------------------------------------------------------------------------------------------------------------------------------------------------------------------------------------------------------------------------------------------------------------------------------------------------------------------------------------------------------------------------------------------------------------------------------------------------------------------------------------------------------------------------------------------------------------------------------------------------------------|
| Ohio           | 5/21/2020 | ✓ | ✓ |   | <ul style="list-style-type: none"> <li>• <a href="https://governor.ohio.gov/wps/portal/gov/governor/media/news-and-media/covid19-update-may-7-2020">https://governor.ohio.gov/wps/portal/gov/governor/media/news-and-media/covid19-update-may-7-2020</a></li> <li>• <a href="https://coronavirus.ohio.gov/static/responsible/Sector-fact-sheet-7-Campgrounds.pdf">https://coronavirus.ohio.gov/static/responsible/Sector-fact-sheet-7-Campgrounds.pdf</a></li> </ul>                                                                                                                                                                                                                         |
| Ohio           | 5/26/2020 | ✓ | ✓ | ✓ | <ul style="list-style-type: none"> <li>• <a href="https://twitter.com/GovMikeDeWine/status/1260999763606089728?s=20">https://twitter.com/GovMikeDeWine/status/1260999763606089728?s=20</a></li> <li>• <a href="https://twitter.com/GovMikeDeWine/status/1261000248257843202?s=20">https://twitter.com/GovMikeDeWine/status/1261000248257843202?s=20</a></li> <li>• <a href="https://twitter.com/GovMikeDeWine/status/1263532677061369856?s=20">https://twitter.com/GovMikeDeWine/status/1263532677061369856?s=20</a></li> <li>• <a href="https://twitter.com/GovMikeDeWine/status/1261000707970383875?s=20">https://twitter.com/GovMikeDeWine/status/1261000707970383875?s=20</a></li> </ul> |
| Ohio           | 5/29/2020 | ✓ |   | ✓ | <ul style="list-style-type: none"> <li>• <a href="https://coronavirus.ohio.gov/static/publicorders/Directors-Stay-Safe-Ohio-Order.pdf">https://coronavirus.ohio.gov/static/publicorders/Directors-Stay-Safe-Ohio-Order.pdf</a></li> </ul>                                                                                                                                                                                                                                                                                                                                                                                                                                                    |
| Ohio           | 5/31/2020 | ✓ |   |   | <ul style="list-style-type: none"> <li>• <a href="https://governor.ohio.gov/wps/portal/gov/governor/media/news-and-media/covid19-update-may-14-2020">https://governor.ohio.gov/wps/portal/gov/governor/media/news-and-media/covid19-update-may-14-2020</a></li> </ul>                                                                                                                                                                                                                                                                                                                                                                                                                        |
| Oklahoma       | 4/24/2020 | ✓ | ✓ | ✓ | <ul style="list-style-type: none"> <li>• <a href="https://www.sos.ok.gov/documents/executive/1937.pdf">https://www.sos.ok.gov/documents/executive/1937.pdf</a></li> <li>• <a href="https://www.okcommerce.gov/covid19/ours-plan/">https://www.okcommerce.gov/covid19/ours-plan/</a></li> </ul>                                                                                                                                                                                                                                                                                                                                                                                               |
| Oklahoma       | 5/1/2020  | ✓ | ✓ | ✓ | <ul style="list-style-type: none"> <li>• <a href="https://www.okcommerce.gov/covid19/ours-plan/">https://www.okcommerce.gov/covid19/ours-plan/</a></li> </ul>                                                                                                                                                                                                                                                                                                                                                                                                                                                                                                                                |
| Oklahoma       | 5/15/2020 |   | ✓ | ✓ | <ul style="list-style-type: none"> <li>• <a href="https://www.okcommerce.gov/wp-content/uploads/Open-Up-and-Recover-Safely-Plan.pdf">https://www.okcommerce.gov/wp-content/uploads/Open-Up-and-Recover-Safely-Plan.pdf</a></li> </ul>                                                                                                                                                                                                                                                                                                                                                                                                                                                        |
| Oklahoma       | 6/1/2020  | ✓ | ✓ |   | <ul style="list-style-type: none"> <li>• <a href="https://www.governor.ok.gov/articles/press_releases/oklahoma-to-begin-phase-3-of-open-up-and-recover">https://www.governor.ok.gov/articles/press_releases/oklahoma-to-begin-phase-3-of-open-up-and-recover</a></li> </ul>                                                                                                                                                                                                                                                                                                                                                                                                                  |
| Oregon         | 5/5/2020  |   |   | ✓ | <ul style="list-style-type: none"> <li>• <a href="https://www.oregon.gov/gov/Documents/executive_orders/eo_20-25.pdf">https://www.oregon.gov/gov/Documents/executive_orders/eo_20-25.pdf</a></li> </ul>                                                                                                                                                                                                                                                                                                                                                                                                                                                                                      |
| Oregon         | 5/15/2020 | ✓ | ✓ | ✓ | <ul style="list-style-type: none"> <li>• <a href="https://www.oregon.gov/gov/Documents/executive_orders/eo_20-25.pdf">https://www.oregon.gov/gov/Documents/executive_orders/eo_20-25.pdf</a></li> </ul>                                                                                                                                                                                                                                                                                                                                                                                                                                                                                      |
| Pennsylvania   | 5/1/2020  |   |   | ✓ | <ul style="list-style-type: none"> <li>• <a href="https://www.governor.pa.gov/newsroom/governor-announces-may-1-statewide-reopening-of-limited-outdoor-recreational-activities-to-help-pennsylvanians-maintain-positive-physical-mental-health/">https://www.governor.pa.gov/newsroom/governor-announces-may-1-statewide-reopening-of-limited-outdoor-recreational-activities-to-help-pennsylvanians-maintain-positive-physical-mental-health/</a></li> </ul>                                                                                                                                                                                                                                |
| Pennsylvania   | 5/8/2020  | ✓ | ✓ |   | <ul style="list-style-type: none"> <li>• <a href="https://www.governor.pa.gov/newsroom/gov-wolf-provides-business-guidance-as-counties-move-to-yellow-phase-on-may-8/">https://www.governor.pa.gov/newsroom/gov-wolf-provides-business-guidance-as-counties-move-to-yellow-phase-on-may-8/</a></li> </ul>                                                                                                                                                                                                                                                                                                                                                                                    |
| Pennsylvania   | 5/22/2020 | ✓ |   |   | <ul style="list-style-type: none"> <li>• <a href="https://www.governor.pa.gov/newsroom/wolf-administration-releases-summer-camp-and-recreation-guidance/">https://www.governor.pa.gov/newsroom/wolf-administration-releases-summer-camp-and-recreation-guidance/</a></li> <li>• <a href="https://www.governor.pa.gov/newsroom/gov-wolf-issues-updated-green-phase-order-guidance-on-dining-and-professional-sports/">https://www.governor.pa.gov/newsroom/gov-wolf-issues-updated-green-phase-order-guidance-on-dining-and-professional-sports/</a></li> </ul>                                                                                                                               |
| Pennsylvania   | 5/29/2020 | ✓ | ✓ | ✓ | <ul style="list-style-type: none"> <li>• <a href="https://www.governor.pa.gov/wp-content/uploads/2020/05/20200527-TWW-green-phase-order.pdf">https://www.governor.pa.gov/wp-content/uploads/2020/05/20200527-TWW-green-phase-order.pdf</a></li> <li>• <a href="https://www.governor.pa.gov/plan-for-pennsylvania/#Phase3Recovery">https://www.governor.pa.gov/plan-for-pennsylvania/#Phase3Recovery</a></li> </ul>                                                                                                                                                                                                                                                                           |
| Rhode Island   | 5/9/2020  | ✓ | ✓ | ✓ | <ul style="list-style-type: none"> <li>• <a href="http://governor.ri.gov/documents/orders/Executive-Order-20-23.pdf">http://governor.ri.gov/documents/orders/Executive-Order-20-23.pdf</a></li> <li>• <a href="https://www.reopeningri.com/resource_pdfs/Phase-I-summary-of-open-settings-05.08.20.pdf">https://www.reopeningri.com/resource_pdfs/Phase-I-summary-of-open-settings-05.08.20.pdf</a></li> </ul>                                                                                                                                                                                                                                                                               |
| Rhode Island   | 5/18/2020 |   | ✓ | ✓ | <ul style="list-style-type: none"> <li>• <a href="https://www.ri.gov/press/view/38315">https://www.ri.gov/press/view/38315</a></li> <li>• <a href="https://www.ri.gov/press/view/38263">https://www.ri.gov/press/view/38263</a></li> </ul>                                                                                                                                                                                                                                                                                                                                                                                                                                                   |
| Rhode Island   | 5/21/2020 | ✓ |   |   | <ul style="list-style-type: none"> <li>• <a href="https://governor.ri.gov/documents/orders/Executive-Order-20-35.pdf">https://governor.ri.gov/documents/orders/Executive-Order-20-35.pdf</a></li> </ul>                                                                                                                                                                                                                                                                                                                                                                                                                                                                                      |
| Rhode Island   | 5/30/2020 |   |   | ✓ | <ul style="list-style-type: none"> <li>• <a href="https://twitter.com/RIHEALTH/status/1262432592953069569?s=20">https://twitter.com/RIHEALTH/status/1262432592953069569?s=20</a></li> </ul>                                                                                                                                                                                                                                                                                                                                                                                                                                                                                                  |
| Rhode Island   | 6/1/2020  | ✓ | ✓ | ✓ | <ul style="list-style-type: none"> <li>• <a href="https://governor.ri.gov/documents/orders/Executive-Order-20-40.pdf">https://governor.ri.gov/documents/orders/Executive-Order-20-40.pdf</a></li> </ul>                                                                                                                                                                                                                                                                                                                                                                                                                                                                                      |
| South Carolina | 4/20/2020 | ✓ | ✓ |   | <ul style="list-style-type: none"> <li>• <a href="https://governor.sc.gov/sites/default/files/Documents/Executive-Orders/2020-04-20%20FILED%20Executive%20Order%20No.%202020-28%20-%20Modification%20of%20Restrictions%20for%20Public%20Beaches%20%26%20Waters%20%26%20Incremental%20Modification%20of%20Non-Essential%20Business%20Closures.pdf">https://governor.sc.gov/sites/default/files/Documents/Executive-Orders/2020-04-20%20FILED%20Executive%20Order%20No.%202020-28%20-%20Modification%20of%20Restrictions%20for%20Public%20Beaches%20%26%20Waters%20%26%20Incremental%20Modification%20of%20Non-Essential%20Business%20Closures.pdf</a></li> </ul>                              |

|                |           |   |   |   |   |                                                                                                                                                                                                                                                                                                                                                                                                                                                                                                                                                                                                                                                                                                                                                                                                                                                                                                                                                     |
|----------------|-----------|---|---|---|---|-----------------------------------------------------------------------------------------------------------------------------------------------------------------------------------------------------------------------------------------------------------------------------------------------------------------------------------------------------------------------------------------------------------------------------------------------------------------------------------------------------------------------------------------------------------------------------------------------------------------------------------------------------------------------------------------------------------------------------------------------------------------------------------------------------------------------------------------------------------------------------------------------------------------------------------------------------|
| South Carolina | 4/21/2020 |   |   |   | ✓ | <ul style="list-style-type: none"> <li>• <a href="https://governor.sc.gov/sites/default/files/Documents/Executive-Orders/2020-04-20%20FILED%20Executive%20Order%20No.%202020-28%20-%20Modification%20of%20Restrictions%20for%20Public%20Beaches%20%26%20Waters%20%26%20Incremental%20Modification%20of%20Non-Essential%20Business%20Closures.pdf">https://governor.sc.gov/sites/default/files/Documents/Executive-Orders/2020-04-20%20FILED%20Executive%20Order%20No.%202020-28%20-%20Modification%20of%20Restrictions%20for%20Public%20Beaches%20%26%20Waters%20%26%20Incremental%20Modification%20of%20Non-Essential%20Business%20Closures.pdf</a></li> </ul>                                                                                                                                                                                                                                                                                     |
| South Carolina | 5/1/2020  |   |   |   | ✓ | <ul style="list-style-type: none"> <li>• <a href="https://governor.sc.gov/sites/default/files/Documents/Executive-Orders/2020-05-01%20eFILED%20Executive%20Order%20No.%202020-30%20-%20Rescinding%20Self-Quarantine%20C%20Lodging%20C%20%26%20Travel%20Restrictions%20for%20Individuals%20Entering%20S.C.%20from%20High-Risk%20Areas.pdf">https://governor.sc.gov/sites/default/files/Documents/Executive-Orders/2020-05-01%20eFILED%20Executive%20Order%20No.%202020-30%20-%20Rescinding%20Self-Quarantine%20C%20Lodging%20C%20%26%20Travel%20Restrictions%20for%20Individuals%20Entering%20S.C.%20from%20High-Risk%20Areas.pdf</a></li> </ul>                                                                                                                                                                                                                                                                                                     |
| South Carolina | 5/4/2020  |   |   |   | ✓ | <ul style="list-style-type: none"> <li>• <a href="https://governor.sc.gov/sites/default/files/Documents/Executive-Orders/2020-04-06%20eFILED%20Executive%20Order%20No.%202020-21%20-%20Stay%20at%20Home%20or%20Work%20Order.pdf">https://governor.sc.gov/sites/default/files/Documents/Executive-Orders/2020-04-06%20eFILED%20Executive%20Order%20No.%202020-21%20-%20Stay%20at%20Home%20or%20Work%20Order.pdf</a></li> </ul>                                                                                                                                                                                                                                                                                                                                                                                                                                                                                                                       |
| South Carolina | 5/11/2020 |   |   |   | ✓ | <ul style="list-style-type: none"> <li>• <a href="https://governor.sc.gov/news/2020-05/gov-henry-mcmaster-restaurants-are-able-open-limited-dine-services-monday-may-11">https://governor.sc.gov/news/2020-05/gov-henry-mcmaster-restaurants-are-able-open-limited-dine-services-monday-may-11</a></li> </ul>                                                                                                                                                                                                                                                                                                                                                                                                                                                                                                                                                                                                                                       |
| South Carolina | 5/18/2020 | ✓ | ✓ |   | ✓ | <ul style="list-style-type: none"> <li>• <a href="https://governor.sc.gov/news/2020-05/gov-henry-mcmaster-announces-additional-businesses-gyms-pools-are-able-open-monday-may">https://governor.sc.gov/news/2020-05/gov-henry-mcmaster-announces-additional-businesses-gyms-pools-are-able-open-monday-may</a></li> </ul>                                                                                                                                                                                                                                                                                                                                                                                                                                                                                                                                                                                                                           |
| South Carolina | 5/22/2020 | ✓ | ✓ |   | ✓ | <ul style="list-style-type: none"> <li>• <a href="https://governor.sc.gov/news/2020-05/gov-henry-mcmaster-lifts-restrictions-attractions-effective-friday-may-22">https://governor.sc.gov/news/2020-05/gov-henry-mcmaster-lifts-restrictions-attractions-effective-friday-may-22</a></li> </ul>                                                                                                                                                                                                                                                                                                                                                                                                                                                                                                                                                                                                                                                     |
| South Dakota   | 4/28/2020 | ✓ | ✓ |   |   | <ul style="list-style-type: none"> <li>• <a href="https://sdsos.gov/general-information/executive-actions/executive-orders/assets/2020-20.PDF">https://sdsos.gov/general-information/executive-actions/executive-orders/assets/2020-20.PDF</a></li> </ul>                                                                                                                                                                                                                                                                                                                                                                                                                                                                                                                                                                                                                                                                                           |
| South Dakota   | 5/2/2020  | ✓ |   |   |   | <ul style="list-style-type: none"> <li>• <a href="https://sdsos.gov/general-information/executive-actions/executive-orders/assets/2020-22.PDF">https://sdsos.gov/general-information/executive-actions/executive-orders/assets/2020-22.PDF</a></li> </ul>                                                                                                                                                                                                                                                                                                                                                                                                                                                                                                                                                                                                                                                                                           |
| Tennessee      | 4/27/2020 | ✓ | ✓ | ✓ |   | <ul style="list-style-type: none"> <li>• <a href="https://www.tn.gov/governor/news/2020/4/24/gov--lee-issues-guidelines-for-restaurants--retail-stores-to-reopen-early-next-week-in-89-counties.html">https://www.tn.gov/governor/news/2020/4/24/gov--lee-issues-guidelines-for-restaurants--retail-stores-to-reopen-early-next-week-in-89-counties.html</a></li> <li>• <a href="https://publications.tnsosfiles.com/pub/execorders/exec-orders-lee29.pdf">https://publications.tnsosfiles.com/pub/execorders/exec-orders-lee29.pdf</a></li> </ul>                                                                                                                                                                                                                                                                                                                                                                                                  |
| Tennessee      | 4/29/2020 | ✓ | ✓ |   |   | <ul style="list-style-type: none"> <li>• <a href="https://publications.tnsosfiles.com/pub/execorders/exec-orders-lee30.pdf">https://publications.tnsosfiles.com/pub/execorders/exec-orders-lee30.pdf</a></li> </ul>                                                                                                                                                                                                                                                                                                                                                                                                                                                                                                                                                                                                                                                                                                                                 |
| Tennessee      | 4/30/2020 |   |   |   | ✓ | <ul style="list-style-type: none"> <li>• <a href="https://publications.tnsosfiles.com/pub/execorders/exec-orders-lee27.pdf">https://publications.tnsosfiles.com/pub/execorders/exec-orders-lee27.pdf</a></li> </ul>                                                                                                                                                                                                                                                                                                                                                                                                                                                                                                                                                                                                                                                                                                                                 |
| Tennessee      | 5/6/2020  | ✓ |   |   |   | <ul style="list-style-type: none"> <li>• <a href="https://www.tn.gov/governor/news/2020/4/30/economic-recovery-group-releases-guidance-for-close-contact-businesses-for-may-6-reopen.html">https://www.tn.gov/governor/news/2020/4/30/economic-recovery-group-releases-guidance-for-close-contact-businesses-for-may-6-reopen.html</a></li> <li>• <a href="https://publications.tnsosfiles.com/pub/execorders/exec-orders-lee33.pdf">https://publications.tnsosfiles.com/pub/execorders/exec-orders-lee33.pdf</a></li> </ul>                                                                                                                                                                                                                                                                                                                                                                                                                        |
| Tennessee      | 5/22/2020 | ✓ | ✓ | ✓ | ✓ | <ul style="list-style-type: none"> <li>• <a href="https://www.tn.gov/governor/news/2020/5/15/economic-recovery-group-to-lift-capacity-restrictions-on-restaurants-and-retail--allow-for-large-attractions-to-open.html">https://www.tn.gov/governor/news/2020/5/15/economic-recovery-group-to-lift-capacity-restrictions-on-restaurants-and-retail--allow-for-large-attractions-to-open.html</a></li> <li>• <a href="https://publications.tnsosfiles.com/pub/execorders/exec-orders-lee38.pdf">https://publications.tnsosfiles.com/pub/execorders/exec-orders-lee38.pdf</a></li> <li>• <a href="https://www.tn.gov/governor/news/2020/5/28/tennessee-s-economic-recovery-group-issues-new-guidance-for-noncontact-sports--summer-camps--and-higher-education.html">https://www.tn.gov/governor/news/2020/5/28/tennessee-s-economic-recovery-group-issues-new-guidance-for-noncontact-sports--summer-camps--and-higher-education.html</a></li> </ul> |
| Texas          | 4/24/2020 | ✓ |   |   |   | <ul style="list-style-type: none"> <li>• <a href="https://gov.texas.gov/news/post/governor-abbott-issues-executive-order-to-safely-and-strategically-reopen-select-services-and-activities-in-texas">https://gov.texas.gov/news/post/governor-abbott-issues-executive-order-to-safely-and-strategically-reopen-select-services-and-activities-in-texas</a></li> </ul>                                                                                                                                                                                                                                                                                                                                                                                                                                                                                                                                                                               |
| Texas          | 5/1/2020  | ✓ | ✓ | ✓ | ✓ | <ul style="list-style-type: none"> <li>• <a href="https://gov.texas.gov/uploads/files/press/EO-GA-14_Statewide_Essential_Service_and_Activity_COVID-19_IMAGE_03-31-2020.pdf">https://gov.texas.gov/uploads/files/press/EO-GA-14_Statewide_Essential_Service_and_Activity_COVID-19_IMAGE_03-31-2020.pdf</a></li> <li>• <a href="https://gov.texas.gov/news/post/governor-abbott-issues-executive-order-relating-to-the-expanded-reopening-of-services">https://gov.texas.gov/news/post/governor-abbott-issues-executive-order-relating-to-the-expanded-reopening-of-services</a></li> </ul>                                                                                                                                                                                                                                                                                                                                                          |
| Texas          | 5/8/2020  | ✓ | ✓ |   |   | <ul style="list-style-type: none"> <li>• <a href="https://gov.texas.gov/news/post/governor-abbott-issues-executive-order-to-expand-openings-of-certain-businesses-and-activities">https://gov.texas.gov/news/post/governor-abbott-issues-executive-order-to-expand-openings-of-certain-businesses-and-activities</a></li> </ul>                                                                                                                                                                                                                                                                                                                                                                                                                                                                                                                                                                                                                     |
| Texas          | 5/18/2020 | ✓ | ✓ | ✓ |   | <ul style="list-style-type: none"> <li>• <a href="https://gov.texas.gov/news/post/governor-abbott-issues-executive-order-to-expand-openings-of-certain-businesses-and-activities">https://gov.texas.gov/news/post/governor-abbott-issues-executive-order-to-expand-openings-of-certain-businesses-and-activities</a></li> <li>• <a href="https://gov.texas.gov/news/post/governor-abbott-announces-phase-two-to-open-texas">https://gov.texas.gov/news/post/governor-abbott-announces-phase-two-to-open-texas</a></li> </ul>                                                                                                                                                                                                                                                                                                                                                                                                                        |

|            |           |   |   |   |   |                                                                                                                                                                                                                                                                                                                                                                                                                                                                                                                                                                                                                                                                                                                                                                 |
|------------|-----------|---|---|---|---|-----------------------------------------------------------------------------------------------------------------------------------------------------------------------------------------------------------------------------------------------------------------------------------------------------------------------------------------------------------------------------------------------------------------------------------------------------------------------------------------------------------------------------------------------------------------------------------------------------------------------------------------------------------------------------------------------------------------------------------------------------------------|
| Texas      | 5/21/2020 |   |   |   | ✓ | <ul style="list-style-type: none"> <li>• <a href="https://gov.texas.gov/news/post/governor-abbott-issues-executive-order-terminating-air-travel-restrictions-related-to-covid-19-pandemic">https://gov.texas.gov/news/post/governor-abbott-issues-executive-order-terminating-air-travel-restrictions-related-to-covid-19-pandemic</a></li> </ul>                                                                                                                                                                                                                                                                                                                                                                                                               |
| Texas      | 5/22/2020 | ✓ | ✓ | ✓ |   | <ul style="list-style-type: none"> <li>• <a href="https://gov.texas.gov/news/post/governor-abbott-announces-phase-two-to-open-texas">https://gov.texas.gov/news/post/governor-abbott-announces-phase-two-to-open-texas</a></li> </ul>                                                                                                                                                                                                                                                                                                                                                                                                                                                                                                                           |
| Texas      | 5/29/2020 | ✓ | ✓ | ✓ |   | <ul style="list-style-type: none"> <li>• <a href="https://gov.texas.gov/news/post/governor-abbott-announces-phase-two-to-open-texas">https://gov.texas.gov/news/post/governor-abbott-announces-phase-two-to-open-texas</a></li> <li>• <a href="https://gov.texas.gov/news/post/governor-abbott-announces-additional-services-and-activities-that-can-open-under-phase-ii">https://gov.texas.gov/news/post/governor-abbott-announces-additional-services-and-activities-that-can-open-under-phase-ii</a></li> </ul>                                                                                                                                                                                                                                              |
| Texas      | 5/31/2020 | ✓ | ✓ |   |   | <ul style="list-style-type: none"> <li>• <a href="https://gov.texas.gov/news/post/governor-abbott-announces-phase-two-to-open-texas">https://gov.texas.gov/news/post/governor-abbott-announces-phase-two-to-open-texas</a></li> </ul>                                                                                                                                                                                                                                                                                                                                                                                                                                                                                                                           |
| Utah       | 5/1/2020  | ✓ | ✓ | ✓ |   | <ul style="list-style-type: none"> <li>• <a href="https://governor.utah.gov/2020/04/30/gov-herbert-issues-executive-order-placing-utah-under-moderate-risk-protocols-for-covid-19/">https://governor.utah.gov/2020/04/30/gov-herbert-issues-executive-order-placing-utah-under-moderate-risk-protocols-for-covid-19/</a></li> <li>• <a href="https://drive.google.com/file/d/1xcR8cszh7ATSZY2Y2NeCkzo5mV4gD3gj/view">https://drive.google.com/file/d/1xcR8cszh7ATSZY2Y2NeCkzo5mV4gD3gj/view</a></li> </ul>                                                                                                                                                                                                                                                      |
| Utah       | 5/6/2020  | ✓ | ✓ | ✓ | ✓ | <ul style="list-style-type: none"> <li>• <a href="https://governor.utah.gov/2020/04/22/governors-statement-on-president-trumps-decision-to-open-national-parks/">https://governor.utah.gov/2020/04/22/governors-statement-on-president-trumps-decision-to-open-national-parks/</a></li> <li>• <a href="https://drive.google.com/file/d/1WGDjm8zPDK5oo6vUZn61by18XjM8ZoyY/view">https://drive.google.com/file/d/1WGDjm8zPDK5oo6vUZn61by18XjM8ZoyY/view</a></li> <li>• <a href="https://governor.utah.gov/2020/04/30/gov-herbert-issues-executive-order-placing-utah-under-moderate-risk-protocols-for-covid-19/">https://governor.utah.gov/2020/04/30/gov-herbert-issues-executive-order-placing-utah-under-moderate-risk-protocols-for-covid-19/</a></li> </ul> |
| Utah       | 5/21/2020 | ✓ | ✓ | ✓ |   | <ul style="list-style-type: none"> <li>• <a href="https://governor.utah.gov/2020/05/22/governor-issues-executive-order-transitioning-summit-and-wasatch-counties-to-yellow-health-risk-status/">https://governor.utah.gov/2020/05/22/governor-issues-executive-order-transitioning-summit-and-wasatch-counties-to-yellow-health-risk-status/</a></li> </ul>                                                                                                                                                                                                                                                                                                                                                                                                     |
| Vermont    | 4/20/2020 | ✓ |   |   |   | <ul style="list-style-type: none"> <li>• <a href="https://governor.vermont.gov/sites/scott/files/documents/ADDENDUM%2010%20TO%20EXECUTIVE%20ORDER%2001-20_0.pdf">https://governor.vermont.gov/sites/scott/files/documents/ADDENDUM%2010%20TO%20EXECUTIVE%20ORDER%2001-20_0.pdf</a></li> </ul>                                                                                                                                                                                                                                                                                                                                                                                                                                                                   |
| Vermont    | 4/27/2020 | ✓ | ✓ |   |   | <ul style="list-style-type: none"> <li>• <a href="https://governor.vermont.gov/sites/scott/files/documents/ADDENDUM%2011%20TO%20EXECUTIVE%20ORDER%2001-20.pdf">https://governor.vermont.gov/sites/scott/files/documents/ADDENDUM%2011%20TO%20EXECUTIVE%20ORDER%2001-20.pdf</a></li> </ul>                                                                                                                                                                                                                                                                                                                                                                                                                                                                       |
| Vermont    | 5/1/2020  | ✓ | ✓ |   |   | <ul style="list-style-type: none"> <li>• <a href="https://governor.vermont.gov/sites/scott/files/documents/ADDENDUM%2011%20TO%20EXECUTIVE%20ORDER%2001-20.pdf">https://governor.vermont.gov/sites/scott/files/documents/ADDENDUM%2011%20TO%20EXECUTIVE%20ORDER%2001-20.pdf</a></li> </ul>                                                                                                                                                                                                                                                                                                                                                                                                                                                                       |
| Vermont    | 5/7/2020  |   |   |   | ✓ | <ul style="list-style-type: none"> <li>• <a href="https://governor.vermont.gov/sites/scott/files/documents/ADDENDUM%2013%20TO%20EXECUTIVE%20ORDER%2001-20.pdf">https://governor.vermont.gov/sites/scott/files/documents/ADDENDUM%2013%20TO%20EXECUTIVE%20ORDER%2001-20.pdf</a></li> </ul>                                                                                                                                                                                                                                                                                                                                                                                                                                                                       |
| Vermont    | 5/15/2020 |   |   |   | ✓ | <ul style="list-style-type: none"> <li>• <a href="https://governor.vermont.gov/sites/scott/files/documents/ADDENDUM%209%20TO%20EXECUTIVE%20ORDER%2001-20.pdf">https://governor.vermont.gov/sites/scott/files/documents/ADDENDUM%209%20TO%20EXECUTIVE%20ORDER%2001-20.pdf</a></li> </ul>                                                                                                                                                                                                                                                                                                                                                                                                                                                                         |
| Vermont    | 5/22/2020 |   | ✓ |   |   | <ul style="list-style-type: none"> <li>• <a href="https://governor.vermont.gov/press-release/governor-phil-scott-announces-limited-reopening-restaurants-hair-salons-additional">https://governor.vermont.gov/press-release/governor-phil-scott-announces-limited-reopening-restaurants-hair-salons-additional</a></li> </ul>                                                                                                                                                                                                                                                                                                                                                                                                                                   |
| Vermont    | 5/29/2020 | ✓ | ✓ |   |   | <ul style="list-style-type: none"> <li>• <a href="https://governor.vermont.gov/press-release/governor-phil-scott-announces-limited-reopening-restaurants-hair-salons-additional">https://governor.vermont.gov/press-release/governor-phil-scott-announces-limited-reopening-restaurants-hair-salons-additional</a></li> </ul>                                                                                                                                                                                                                                                                                                                                                                                                                                   |
| Vermont    | 6/1/2020  |   |   | ✓ |   | <ul style="list-style-type: none"> <li>• <a href="https://governor.vermont.gov/press-release/governor-phil-scott-announces-opening-additional-business-operations-increased-social">https://governor.vermont.gov/press-release/governor-phil-scott-announces-opening-additional-business-operations-increased-social</a></li> </ul>                                                                                                                                                                                                                                                                                                                                                                                                                             |
| Virginia   | 5/15/2020 | ✓ | ✓ | ✓ | ✓ | <ul style="list-style-type: none"> <li>• <a href="https://www.governor.virginia.gov/newsroom/all-releases/2020/may/headline-856681-en.html">https://www.governor.virginia.gov/newsroom/all-releases/2020/may/headline-856681-en.html</a></li> </ul>                                                                                                                                                                                                                                                                                                                                                                                                                                                                                                             |
| Virginia   | 5/29/2020 | ✓ | ✓ | ✓ | ✓ | <ul style="list-style-type: none"> <li>• <a href="https://www.governor.virginia.gov/newsroom/all-releases/2020/may/headline-856741-en.html">https://www.governor.virginia.gov/newsroom/all-releases/2020/may/headline-856741-en.html</a></li> </ul>                                                                                                                                                                                                                                                                                                                                                                                                                                                                                                             |
| Washington | 5/5/2020  | ✓ | ✓ |   | ✓ | <ul style="list-style-type: none"> <li>• <a href="https://www.governor.wa.gov/news-media/inslee-announces-easing-outdoor-restrictions">https://www.governor.wa.gov/news-media/inslee-announces-easing-outdoor-restrictions</a></li> <li>• <a href="https://www.governor.wa.gov/sites/default/files/20-25.3%20-%20COVID-19%20Stay%20Home%20Stay%20Healthy%20-%20Reopening%20&amp;utm_medium=email&amp;utm_source=govdelivery">https://www.governor.wa.gov/sites/default/files/20-25.3%20-%20COVID-19%20Stay%20Home%20Stay%20Healthy%20-%20Reopening%20&amp;utm_medium=email&amp;utm_source=govdelivery</a></li> </ul>                                                                                                                                            |

|               |           |   |   |   |   |                                                                                                                                                                                                                                                                                                                                                                                                                                                                                                                                                                                                                                                                                                                                                                                                                                                                                                                                                                                                                                                                               |
|---------------|-----------|---|---|---|---|-------------------------------------------------------------------------------------------------------------------------------------------------------------------------------------------------------------------------------------------------------------------------------------------------------------------------------------------------------------------------------------------------------------------------------------------------------------------------------------------------------------------------------------------------------------------------------------------------------------------------------------------------------------------------------------------------------------------------------------------------------------------------------------------------------------------------------------------------------------------------------------------------------------------------------------------------------------------------------------------------------------------------------------------------------------------------------|
| Washington    | 6/1/2020  | ✓ | ✓ | ✓ | ✓ | <ul style="list-style-type: none"> <li>• <a href="https://coronavirus.wa.gov/what-you-need-know/county-status-and-safe-start-application-process">https://coronavirus.wa.gov/what-you-need-know/county-status-and-safe-start-application-process</a></li> <li>• <a href="https://www.governor.wa.gov/sites/default/files/20-25.4%20-%20COVID-19%20Safe%20Start.pdf">https://www.governor.wa.gov/sites/default/files/20-25.4%20-%20COVID-19%20Safe%20Start.pdf</a></li> <li>• <a href="https://www.governor.wa.gov/sites/default/files/SafeStart%20PhasedReopening.pdf">https://www.governor.wa.gov/sites/default/files/SafeStart Phased Reopening.pdf</a></li> </ul>                                                                                                                                                                                                                                                                                                                                                                                                          |
| West Virginia | 5/4/2020  | ✓ | ✓ | ✓ | ✓ | <ul style="list-style-type: none"> <li>• <a href="https://governor.wv.gov/Pages/Safer-at-Home.aspx">https://governor.wv.gov/Pages/Safer-at-Home.aspx</a></li> <li>• <a href="https://governor.wv.gov/Documents/2020%20Executive%20Orders/Executive-Order-April-30-2020-Safer-At-Home-Order.pdf">https://governor.wv.gov/Documents/2020%20Executive%20Orders/Executive-Order-April-30-2020-Safer-At-Home-Order.pdf</a></li> </ul>                                                                                                                                                                                                                                                                                                                                                                                                                                                                                                                                                                                                                                              |
| West Virginia | 5/11/2020 | ✓ | ✓ |   |   | <ul style="list-style-type: none"> <li>• <a href="https://governor.wv.gov/Pages/The-Comeback.aspx">https://governor.wv.gov/Pages/The-Comeback.aspx</a></li> </ul>                                                                                                                                                                                                                                                                                                                                                                                                                                                                                                                                                                                                                                                                                                                                                                                                                                                                                                             |
| West Virginia | 5/18/2020 | ✓ | ✓ |   |   | <ul style="list-style-type: none"> <li>• <a href="https://governor.wv.gov/News/press-releases/2020/Pages/COVID-19-UPDATE-Gov.-Justice-announces-additional-reopenings.aspx">https://governor.wv.gov/News/press-releases/2020/Pages/COVID-19-UPDATE-Gov.-Justice-announces-additional-reopenings.aspx</a></li> <li>• <a href="https://governor.wv.gov/News/press-releases/2020/Pages/COVID-19-UPDATE-Gov.-Justice-adds-more-recreational-activities-to-list-of-upcoming-reopenings.aspx">https://governor.wv.gov/News/press-releases/2020/Pages/COVID-19-UPDATE-Gov.-Justice-adds-more-recreational-activities-to-list-of-upcoming-reopenings.aspx</a></li> </ul>                                                                                                                                                                                                                                                                                                                                                                                                              |
| West Virginia | 5/21/2020 | ✓ | ✓ | ✓ | ✓ | <ul style="list-style-type: none"> <li>• <a href="https://governor.wv.gov/News/press-releases/2020/Pages/COVID-19-UPDATE-Gov.-Justice-announces-schedule-for-additional-reopenings.aspx">https://governor.wv.gov/News/press-releases/2020/Pages/COVID-19-UPDATE-Gov.-Justice-announces-schedule-for-additional-reopenings.aspx</a></li> <li>• <a href="https://governor.wv.gov/News/press-releases/2020/Pages/COVID-19-UPDATE-Gov.-Justice-announces-schedule-for-additional-reopenings-including-malls-bars-casinos-and-more.aspx">https://governor.wv.gov/News/press-releases/2020/Pages/COVID-19-UPDATE-Gov.-Justice-announces-schedule-for-additional-reopenings-including-malls-bars-casinos-and-more.aspx</a></li> <li>• <a href="https://governor.wv.gov/News/press-releases/2020/Pages/COVID-19-UPDATE-Gov.-Justice-signs-order-for-Week-4-businesses-results-of-nursing-home-testing.aspx">https://governor.wv.gov/News/press-releases/2020/Pages/COVID-19-UPDATE-Gov.-Justice-signs-order-for-Week-4-businesses-results-of-nursing-home-testing.aspx</a></li> </ul> |
| West Virginia | 5/30/2020 | ✓ | ✓ | ✓ | ✓ | <ul style="list-style-type: none"> <li>• <a href="https://governor.wv.gov/News/press-releases/2020/Pages/COVID-19-UPDATE-Gov.-Justice-signs-order-formalizing-May-30-reopenings-WVSSAC-athletics-and-additional-sports-scheduled.aspx">https://governor.wv.gov/News/press-releases/2020/Pages/COVID-19-UPDATE-Gov.-Justice-signs-order-formalizing-May-30-reopenings-WVSSAC-athletics-and-additional-sports-scheduled.aspx</a></li> </ul>                                                                                                                                                                                                                                                                                                                                                                                                                                                                                                                                                                                                                                     |
| Wisconsin     | 4/24/2020 |   |   |   | ✓ | <ul style="list-style-type: none"> <li>• <a href="https://evers.wi.gov/Documents/COVID19/EMO28-SaferAtHome.pdf">https://evers.wi.gov/Documents/COVID19/EMO28-SaferAtHome.pdf</a></li> </ul>                                                                                                                                                                                                                                                                                                                                                                                                                                                                                                                                                                                                                                                                                                                                                                                                                                                                                   |
| Wisconsin     | 5/11/2020 | ✓ | ✓ |   |   | <ul style="list-style-type: none"> <li>• <a href="https://content.govdelivery.com/attachments/WIGOV/2020/05/11/file_attachments/1447953/EMO36-SAHdialTurn2.pdf">https://content.govdelivery.com/attachments/WIGOV/2020/05/11/file_attachments/1447953/EMO36-SAHdialTurn2.pdf</a></li> </ul>                                                                                                                                                                                                                                                                                                                                                                                                                                                                                                                                                                                                                                                                                                                                                                                   |
| Wisconsin     | 5/13/2020 | ✓ | ✓ |   | ✓ | <ul style="list-style-type: none"> <li>• <a href="https://www.npr.org/sections/coronavirus-live-updates/2020/05/13/855782006/wisconsin-supreme-court-overturns-the-states-stay-at-home-order">https://www.npr.org/sections/coronavirus-live-updates/2020/05/13/855782006/wisconsin-supreme-court-overturns-the-states-stay-at-home-order</a></li> </ul>                                                                                                                                                                                                                                                                                                                                                                                                                                                                                                                                                                                                                                                                                                                       |
| Wyoming       | 5/1/2020  | ✓ | ✓ |   |   | <ul style="list-style-type: none"> <li>• <a href="https://governor.wyo.gov/media/news-releases/2020-news-releases/governor-gordon-authorizes-re-opening-of-gyms-personal-care-services-under">https://governor.wyo.gov/media/news-releases/2020-news-releases/governor-gordon-authorizes-re-opening-of-gyms-personal-care-services-under</a></li> <li>• <a href="https://health.wyo.gov/wp-content/uploads/2020/04/Third-Continuation_Order1.pdf">https://health.wyo.gov/wp-content/uploads/2020/04/Third-Continuation_Order1.pdf</a></li> <li>• <a href="https://drive.google.com/file/d/1avYfW9QZHUGd_tf09qp0JSdyERHI-Uel/view">https://drive.google.com/file/d/1avYfW9QZHUGd_tf09qp0JSdyERHI-Uel/view</a></li> </ul>                                                                                                                                                                                                                                                                                                                                                       |
| Wyoming       | 5/8/2020  |   |   |   | ✓ | <ul style="list-style-type: none"> <li>• <a href="https://drive.google.com/file/d/1kEolo4yHtYRoZICSH3HQ9FW1FctZkyc5/view">https://drive.google.com/file/d/1kEolo4yHtYRoZICSH3HQ9FW1FctZkyc5/view</a></li> </ul>                                                                                                                                                                                                                                                                                                                                                                                                                                                                                                                                                                                                                                                                                                                                                                                                                                                               |
| Wyoming       | 5/15/2020 | ✓ | ✓ |   |   | <ul style="list-style-type: none"> <li>• <a href="https://governor.wyo.gov/media/news-releases/2020-news-releases/restrictions-ease-under-new-orders-governor-allocates-1.7-million-in-cares">https://governor.wyo.gov/media/news-releases/2020-news-releases/restrictions-ease-under-new-orders-governor-allocates-1.7-million-in-cares</a></li> </ul>                                                                                                                                                                                                                                                                                                                                                                                                                                                                                                                                                                                                                                                                                                                       |
| Wyoming       | 6/1/2020  |   |   | ✓ |   | <ul style="list-style-type: none"> <li>• <a href="https://drive.google.com/file/d/1UsvpTw6dCk9V_KSP7i_lyn7ien_1uFBX/view">https://drive.google.com/file/d/1UsvpTw6dCk9V_KSP7i_lyn7ien_1uFBX/view</a></li> </ul>                                                                                                                                                                                                                                                                                                                                                                                                                                                                                                                                                                                                                                                                                                                                                                                                                                                               |
| Wyoming       | 6/1/2020  | ✓ | ✓ | ✓ |   | <ul style="list-style-type: none"> <li>• <a href="https://governor.wyo.gov/media/news-releases/2020-news-releases/outdoor-gatherings-up-to-250-persons-to-be-permitted-under-new-health-order">https://governor.wyo.gov/media/news-releases/2020-news-releases/outdoor-gatherings-up-to-250-persons-to-be-permitted-under-new-health-order</a></li> </ul>                                                                                                                                                                                                                                                                                                                                                                                                                                                                                                                                                                                                                                                                                                                     |
| Wyoming       | 6/1/2020  |   |   | ✓ |   | <ul style="list-style-type: none"> <li>• <a href="https://governor.wyo.gov/media/news-releases/2020-news-releases/outdoor-gatherings-up-to-250-persons-to-be-permitted-under-new-health-order">https://governor.wyo.gov/media/news-releases/2020-news-releases/outdoor-gatherings-up-to-250-persons-to-be-permitted-under-new-health-order</a></li> </ul>                                                                                                                                                                                                                                                                                                                                                                                                                                                                                                                                                                                                                                                                                                                     |

Notes: A, reopening schools; B, reopening workplaces; C, reopening the service industry; D, allowing public events; E, reopening outdoor recreational facilities; F, lifting restrictions on internal movement; G, lifting mandatory quarantines for interstate travel



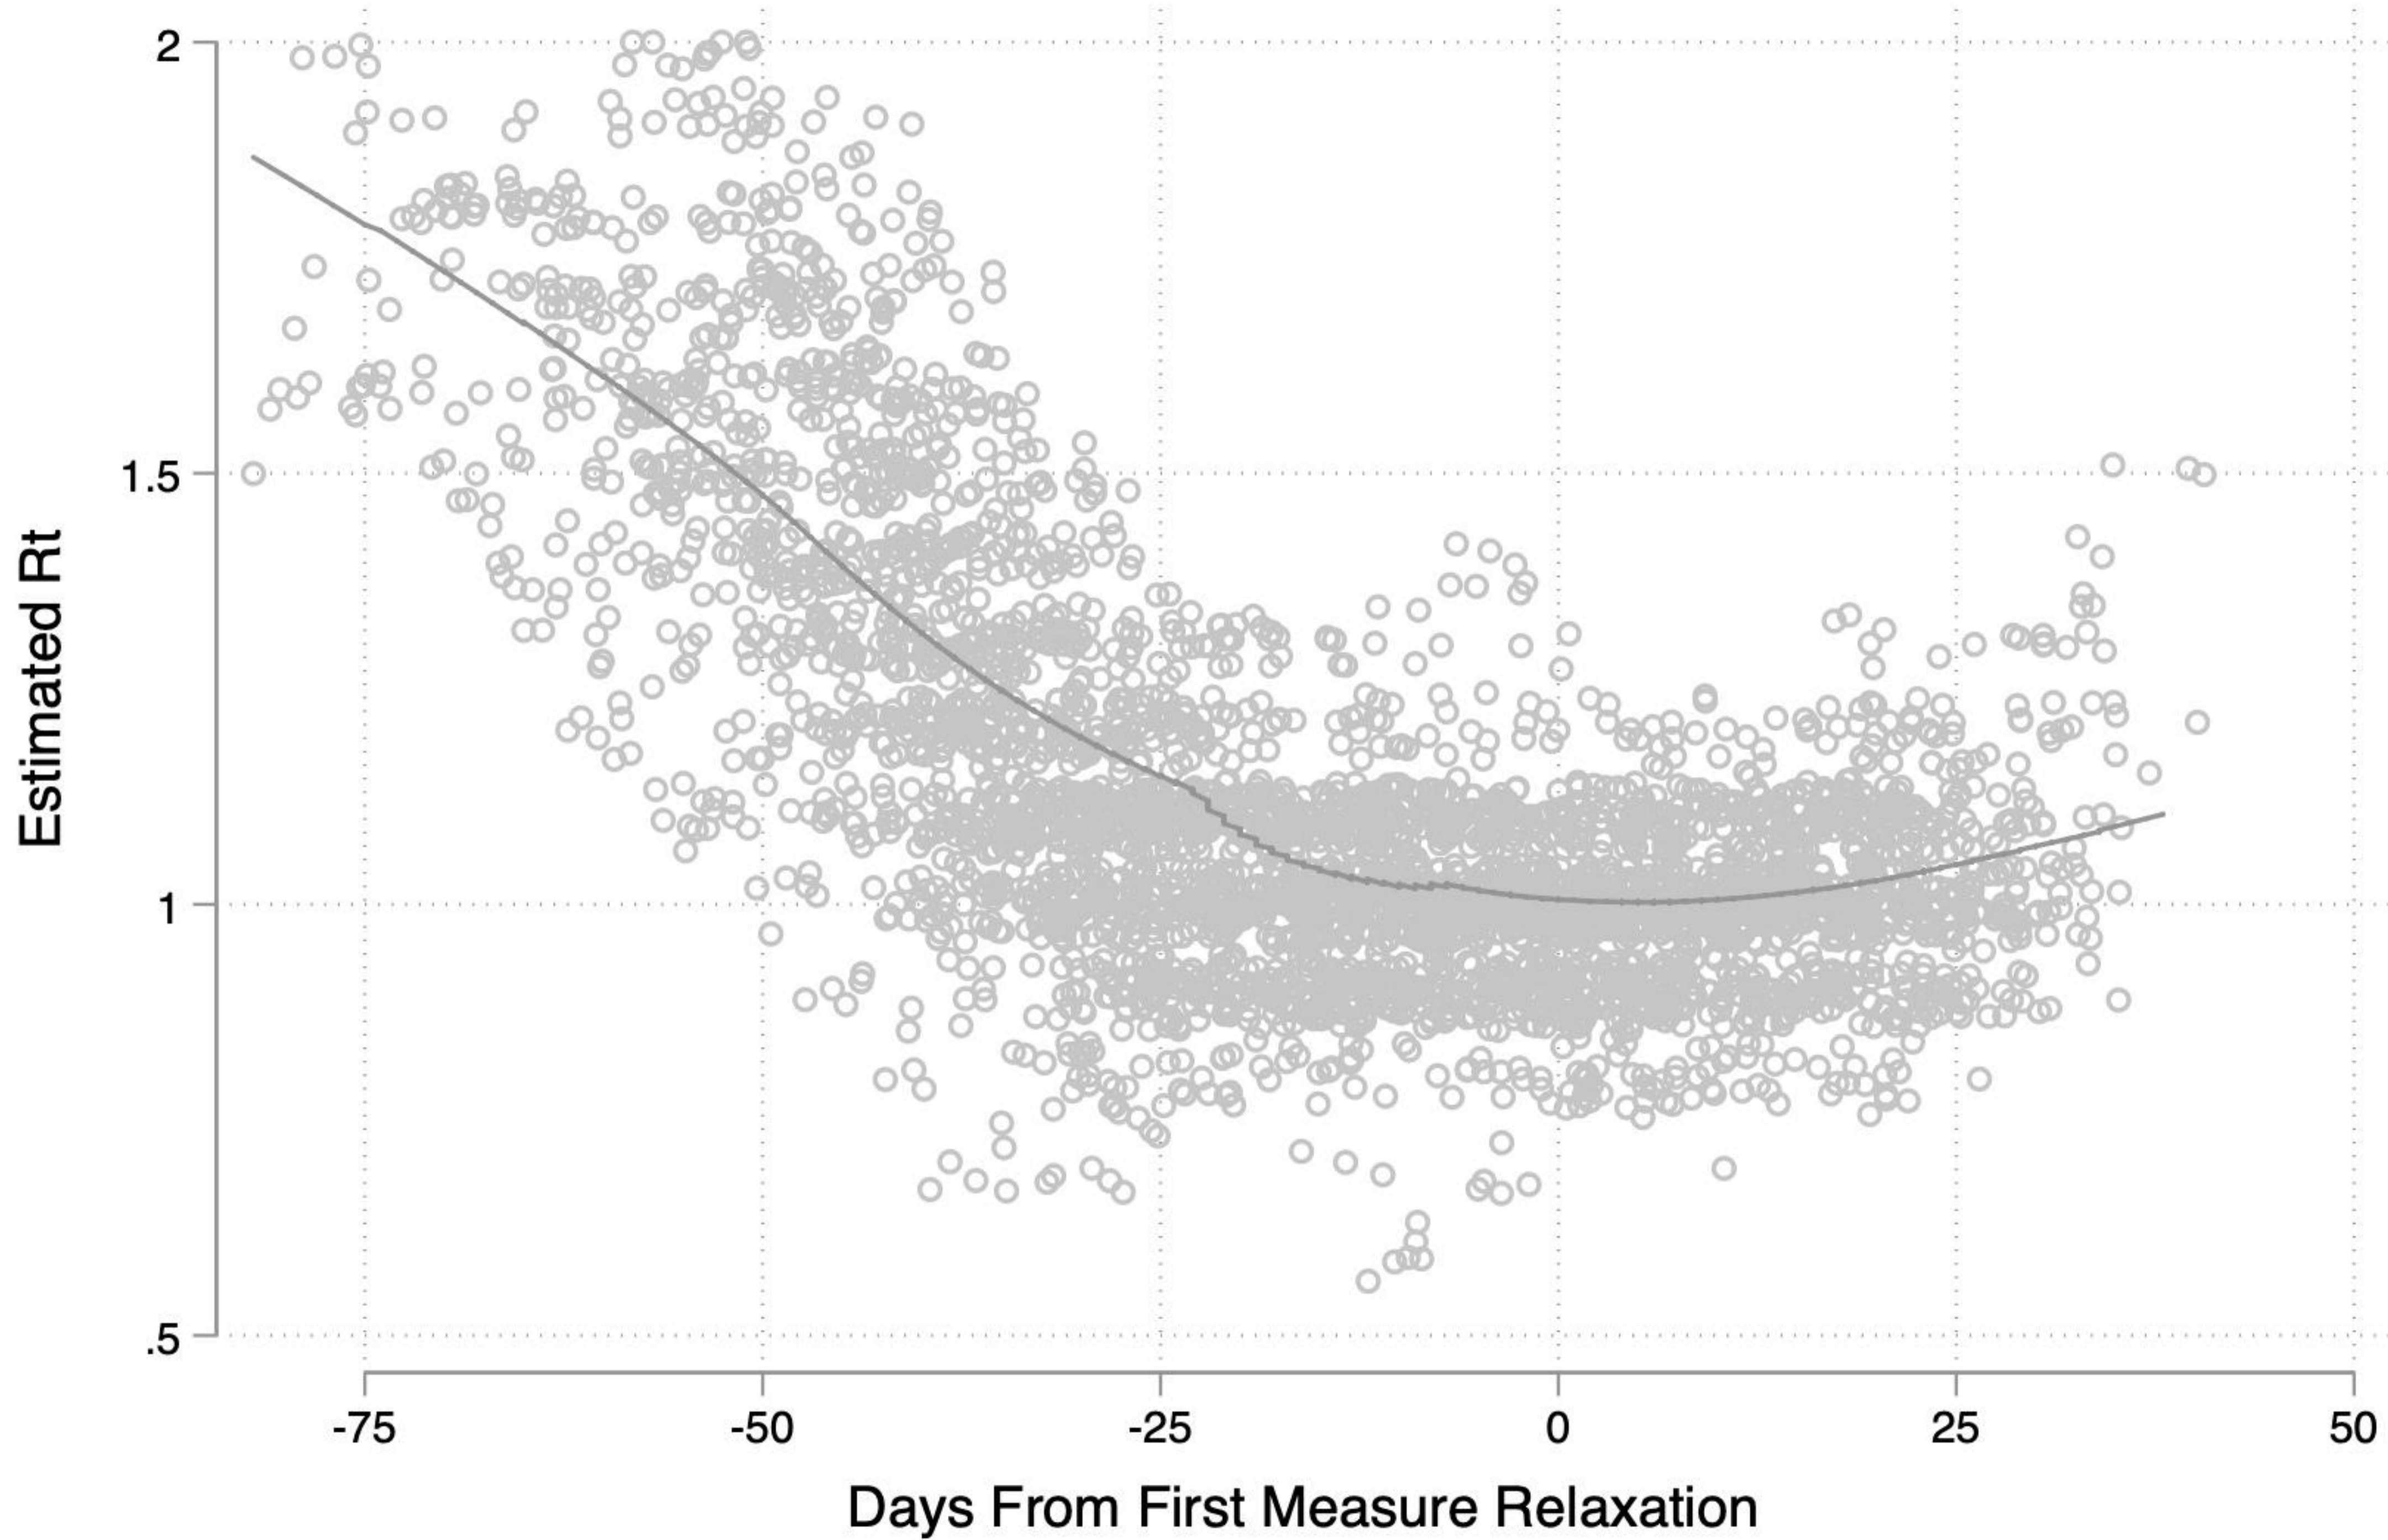

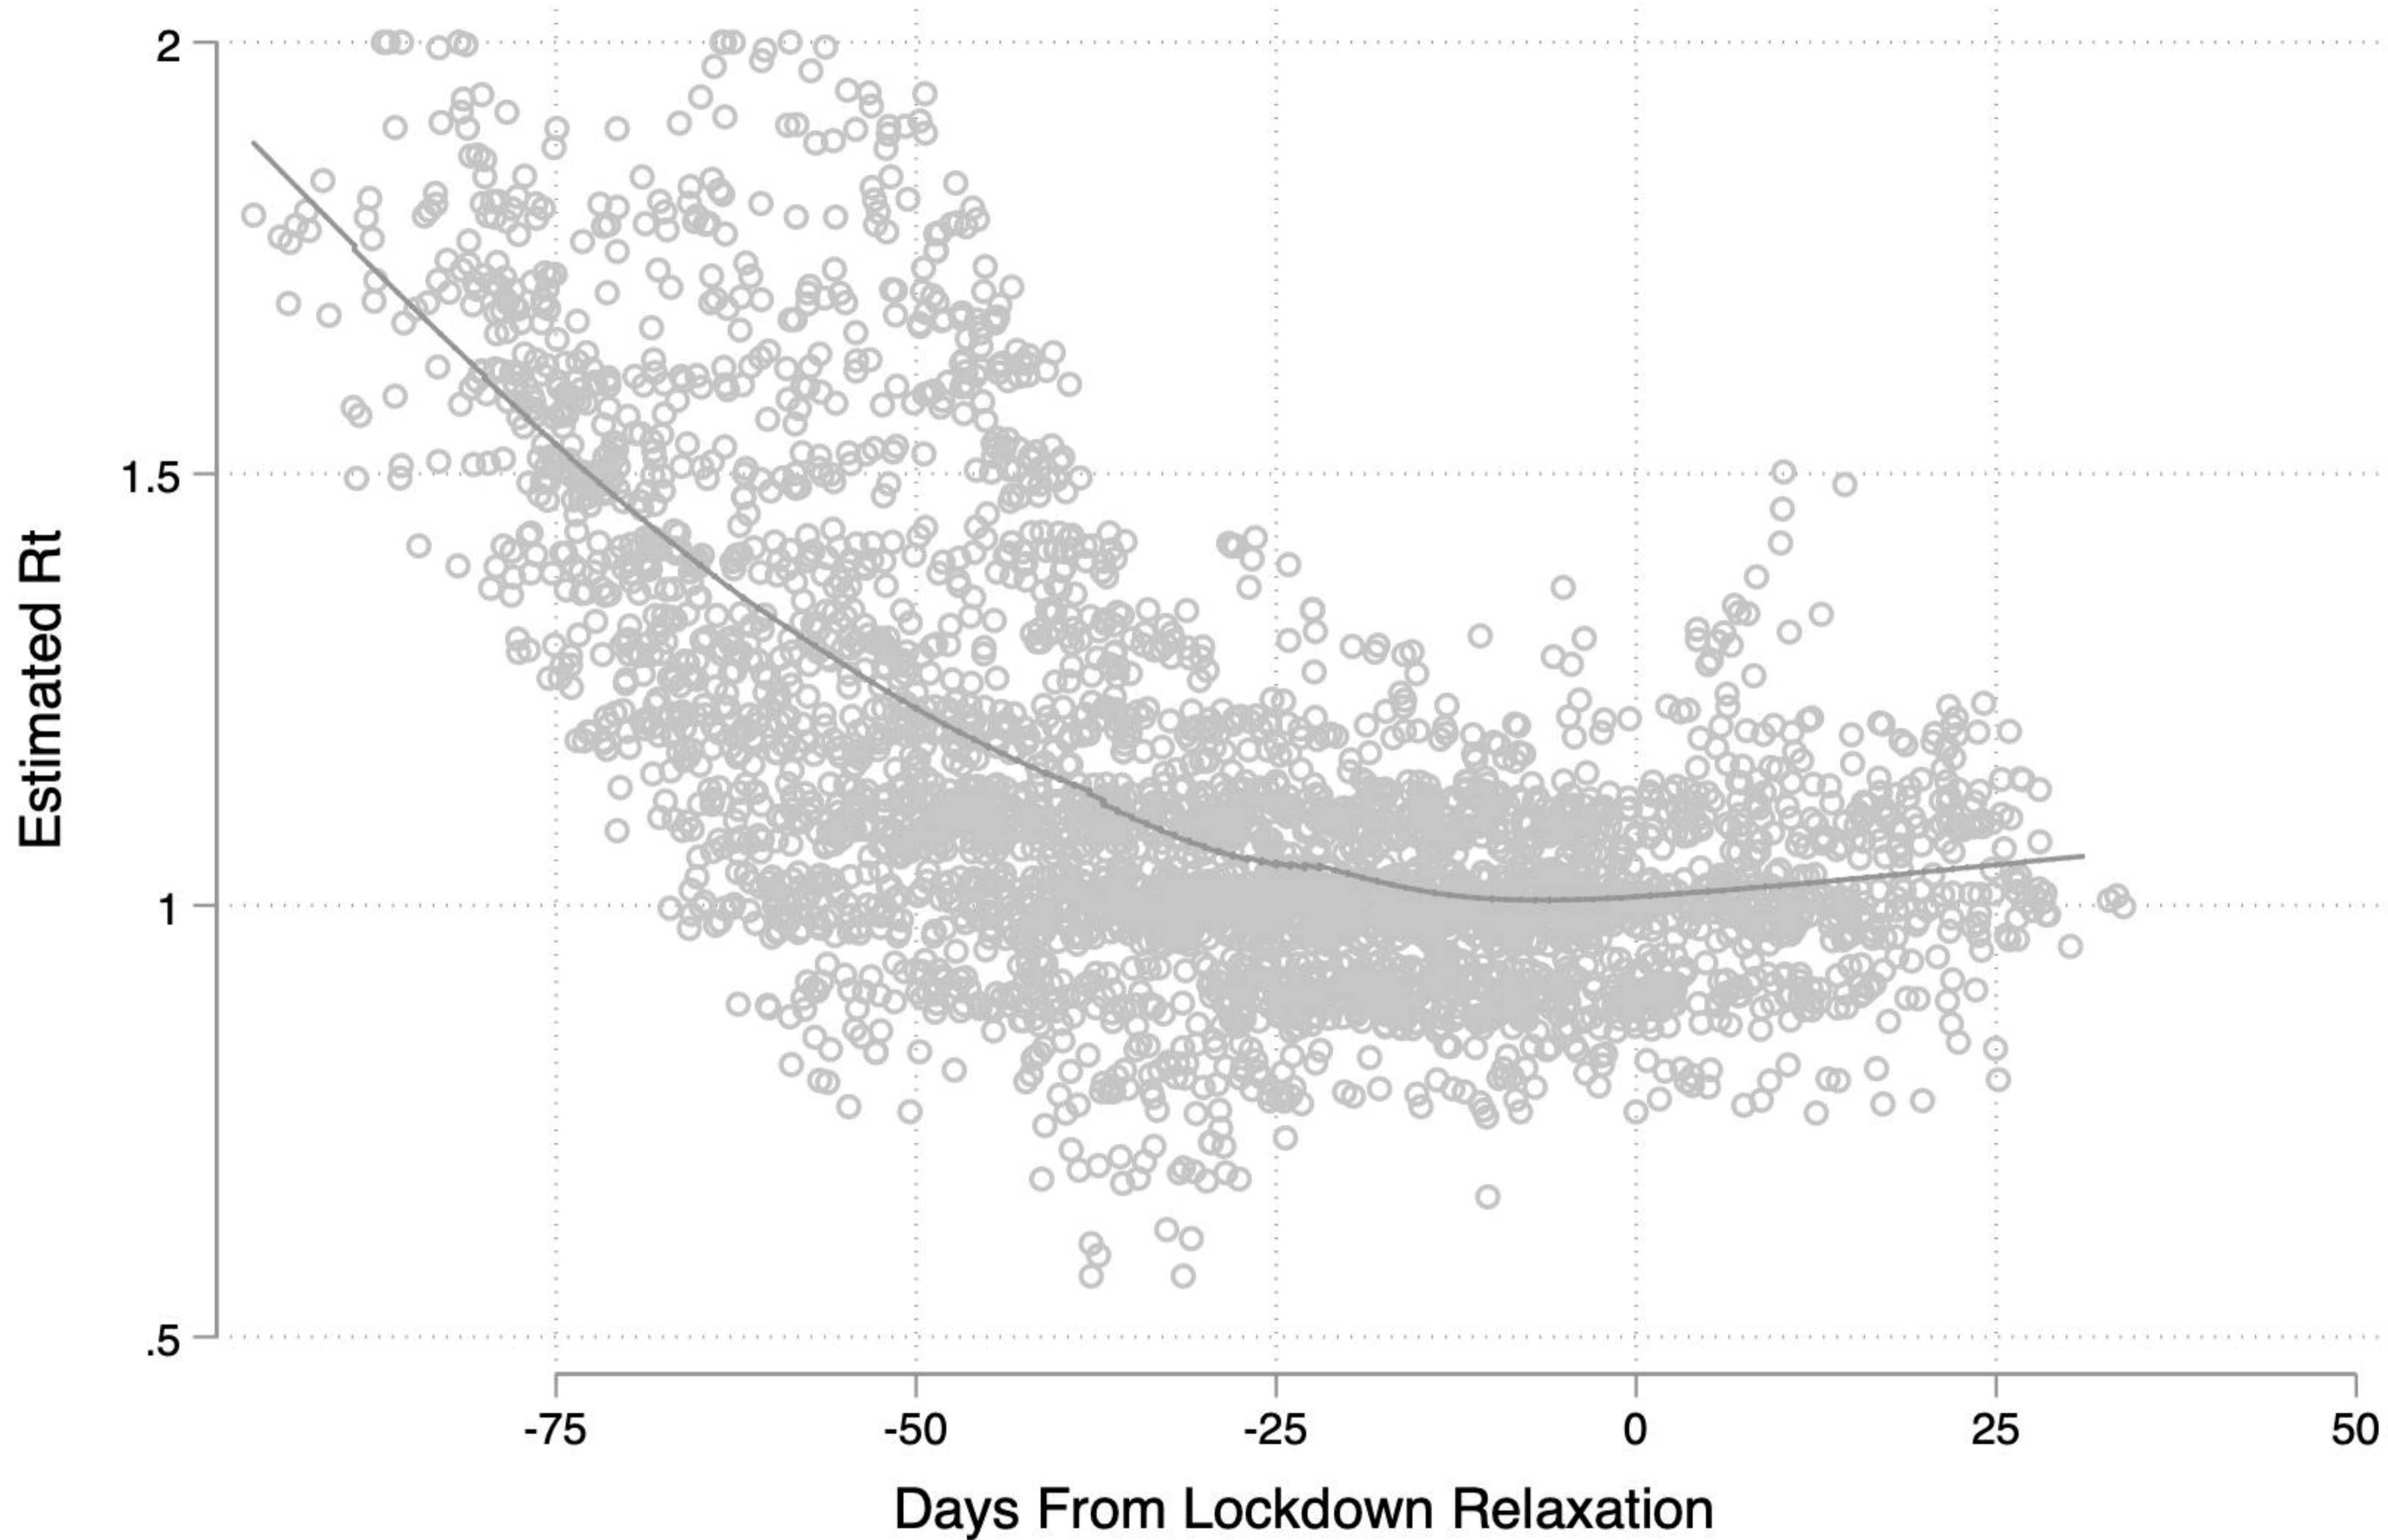

Source: https://www.medrxiv.org/content/10.1101/2020.07.15.20154534v1.full.pdf
